# Supplementary material for: Analyzing rare mutations in metagenomes assembled using long and accurate reads
Source: HighWire-hosted journal article supplement (doi:10.1101/gr.276917.122), 2022-11-01
Supplement: Supplemental_Code_S2.zip [file chickengut_fdr_curves.pdf › sheepgut-main/notebooks/figs/chickengut_fdr_curves.pdf]

FDR curves for naïve  $p$ -mutation calling ( $p = 4.99\%$  to  $p = 1.00\%$ ),  
using 8 target contigs  $\geq 1$  Mbp with average coverage  $\geq 100x$

Number of called rare ( $p < 5\%$ )  $p$ -mutations per megabase

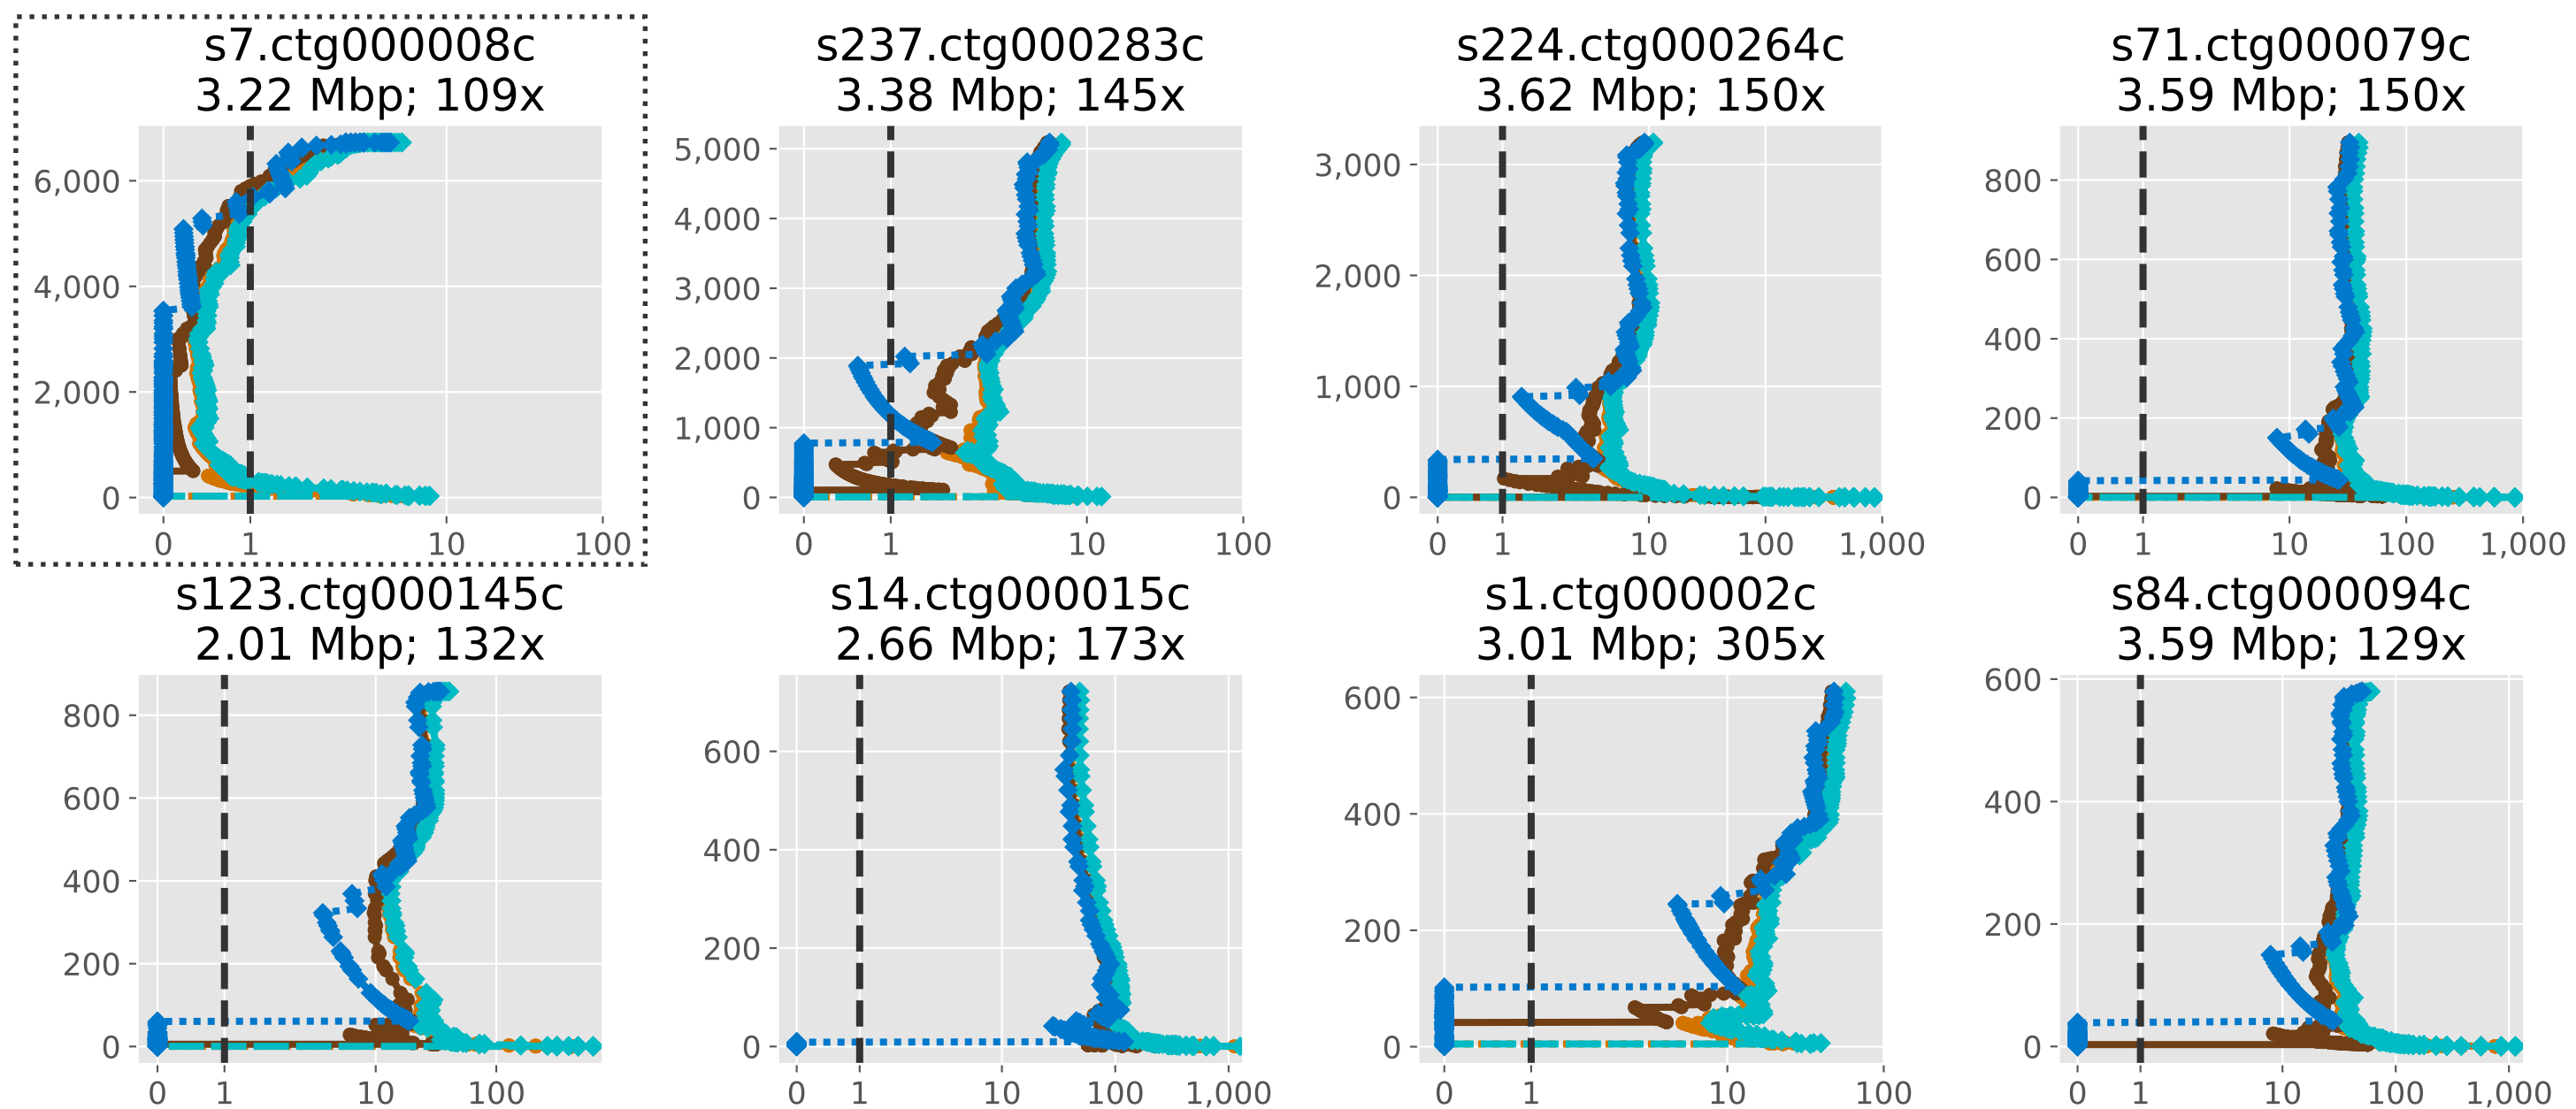

s7.ctg000008c FDR curves for 10 decoy contexts

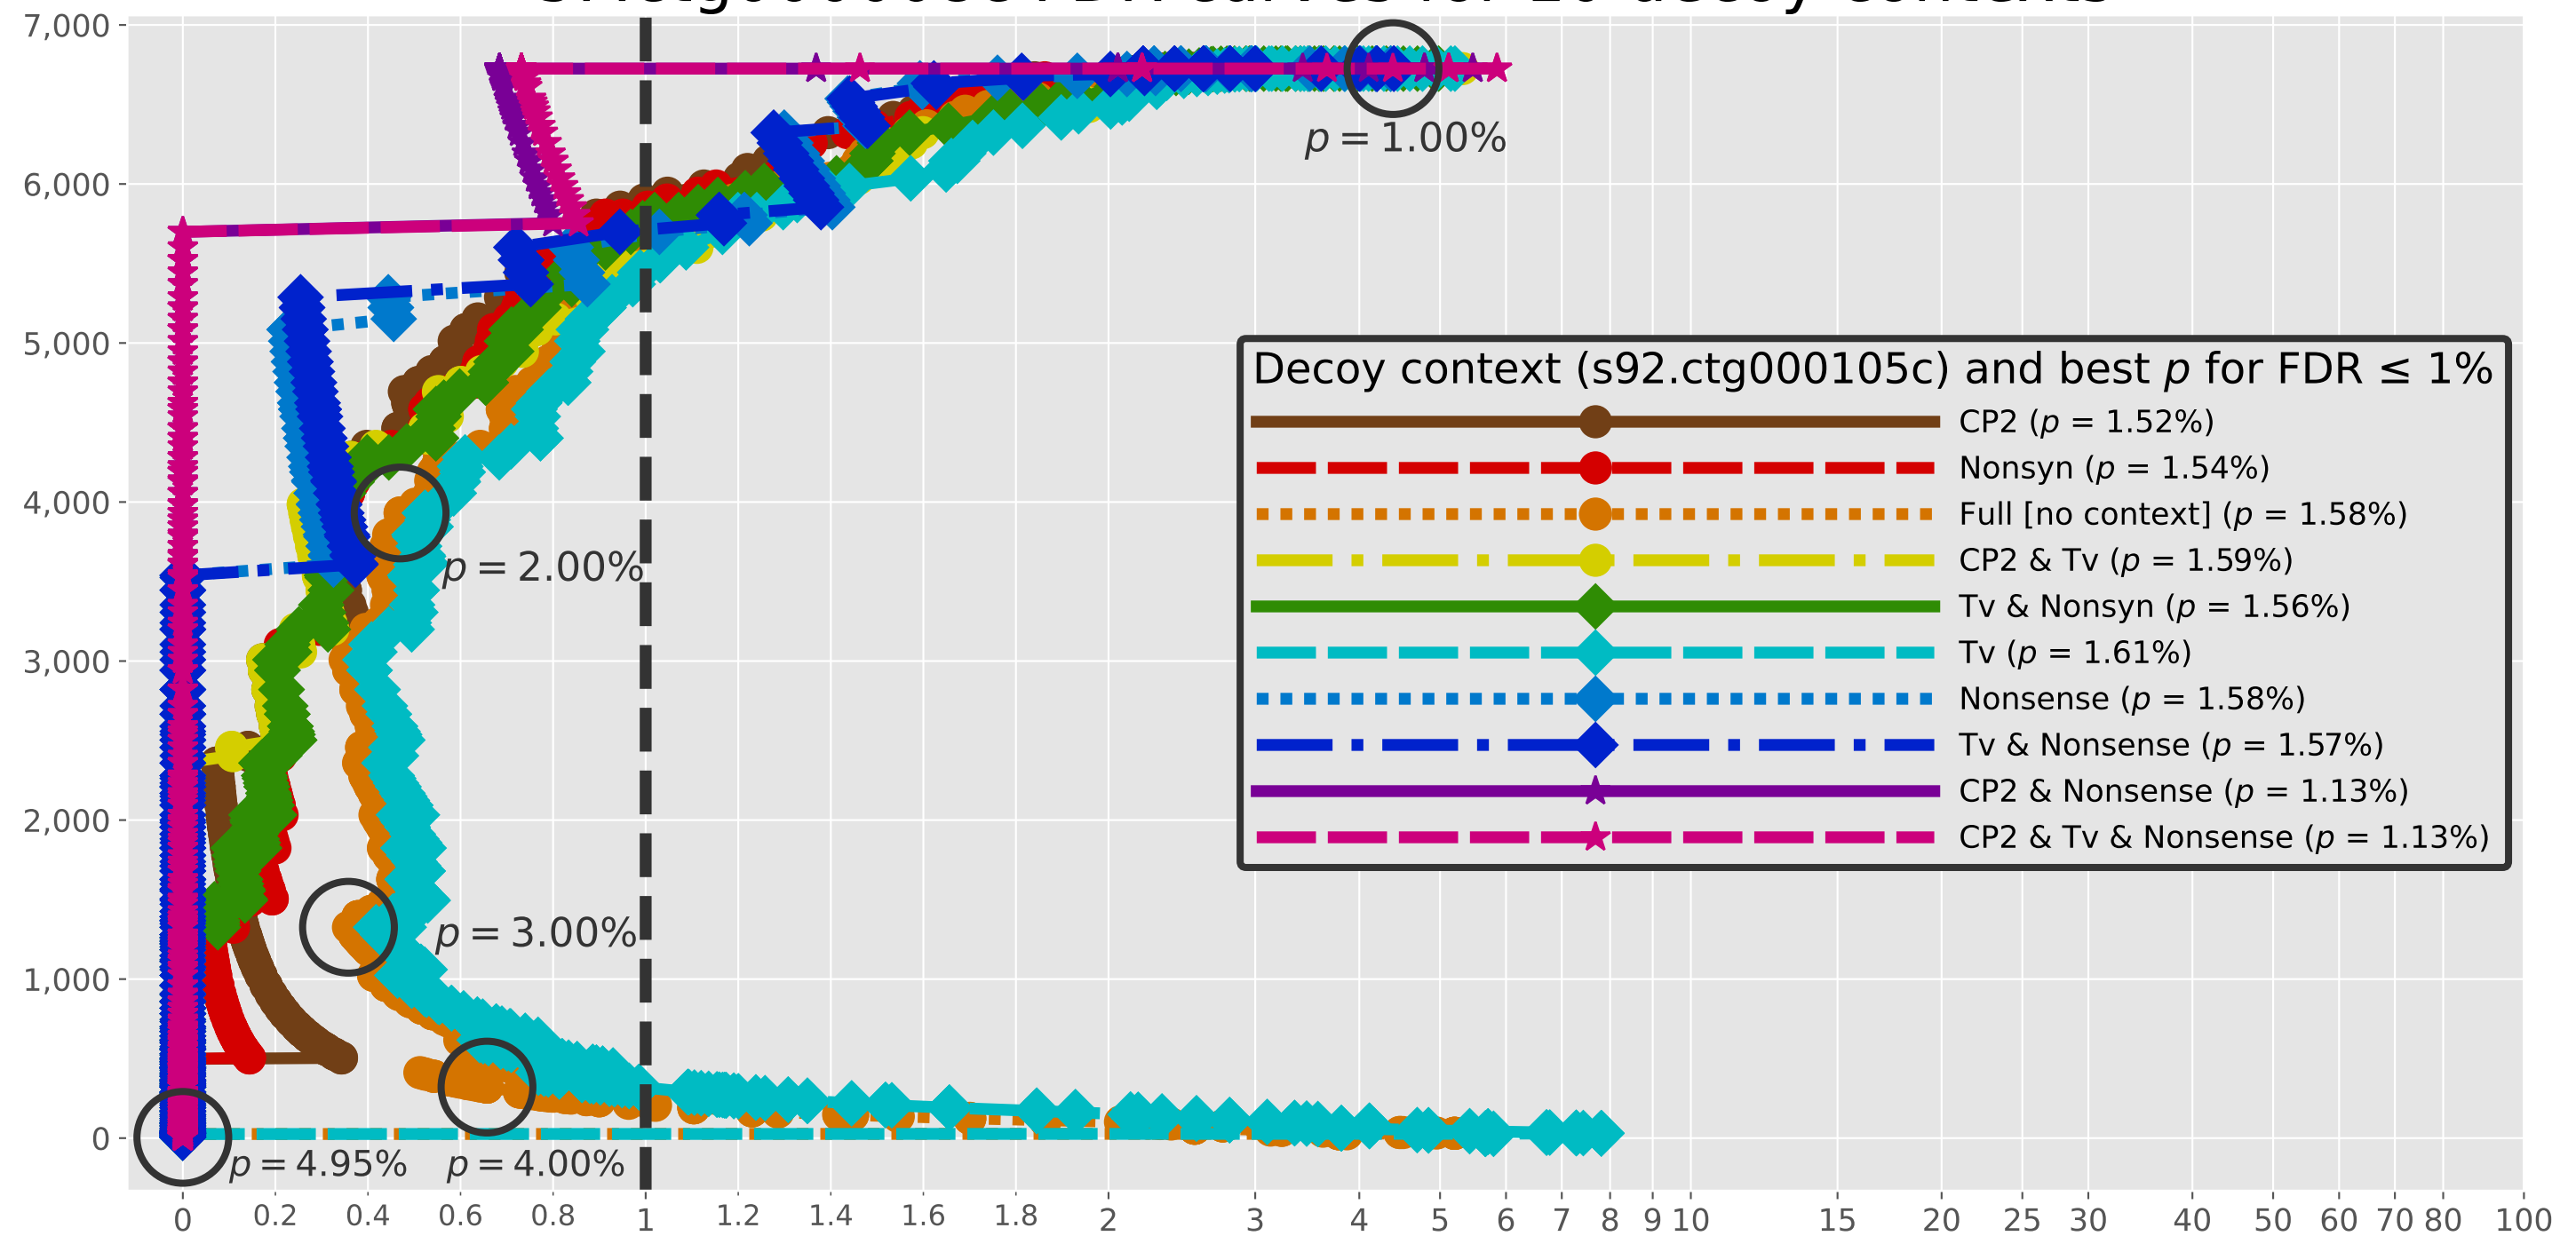

Estimated FDR of called rare ( $p < 5\%$ )  $p$ -mutations (%),  
using a log<sub>10</sub> scale to highlight order-of-magnitude differences
