# Supplementary material for: Analyzing rare mutations in metagenomes assembled using long and accurate reads
Source: HighWire-hosted journal article supplement (doi:10.1101/gr.276917.122), 2022-11-01
Supplement: Supplemental_Code_S2.zip [file deletion_rich_positions.pdf › sheepgut-main/notebooks/figs/deletion_rich_positions.pdf]

# Number of "deletion-rich" positions per contig

SheepGut (all 78,793 contigs)

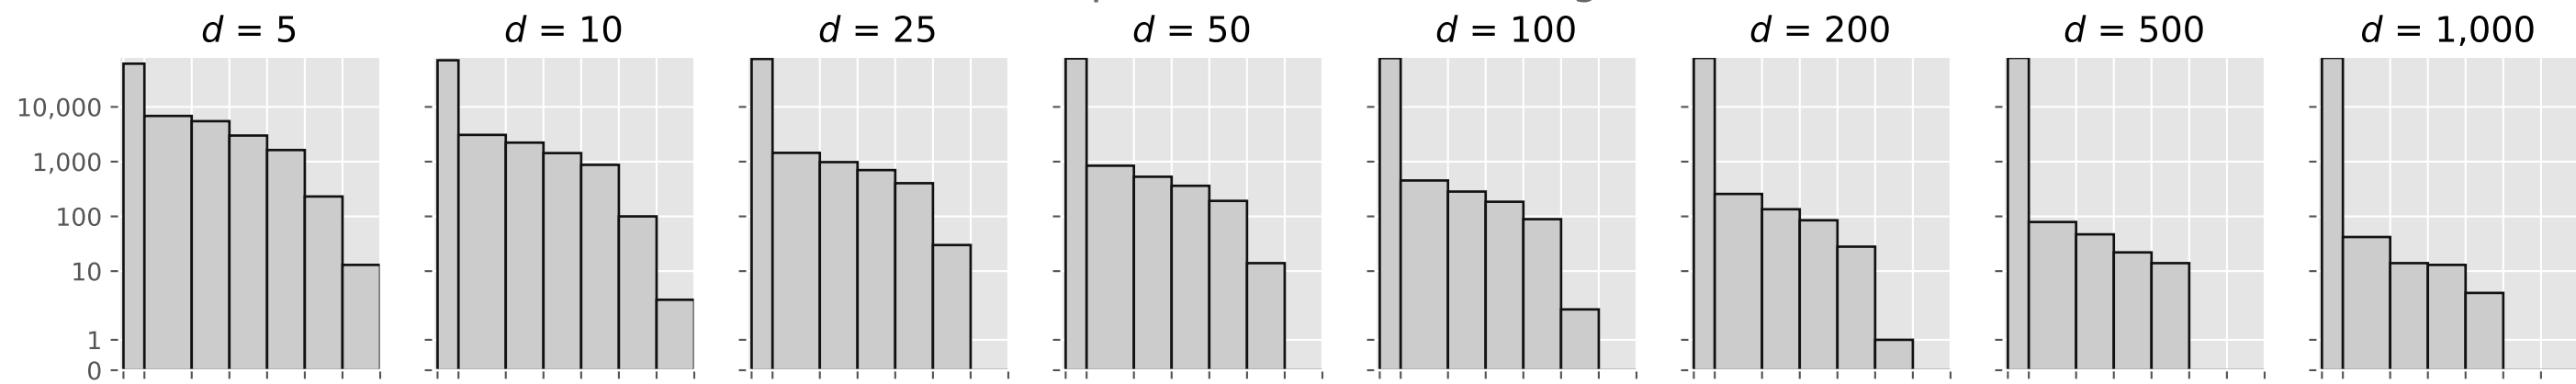

SheepGut (just the 468 contigs with lengths  $\geq 1$  Mbp)

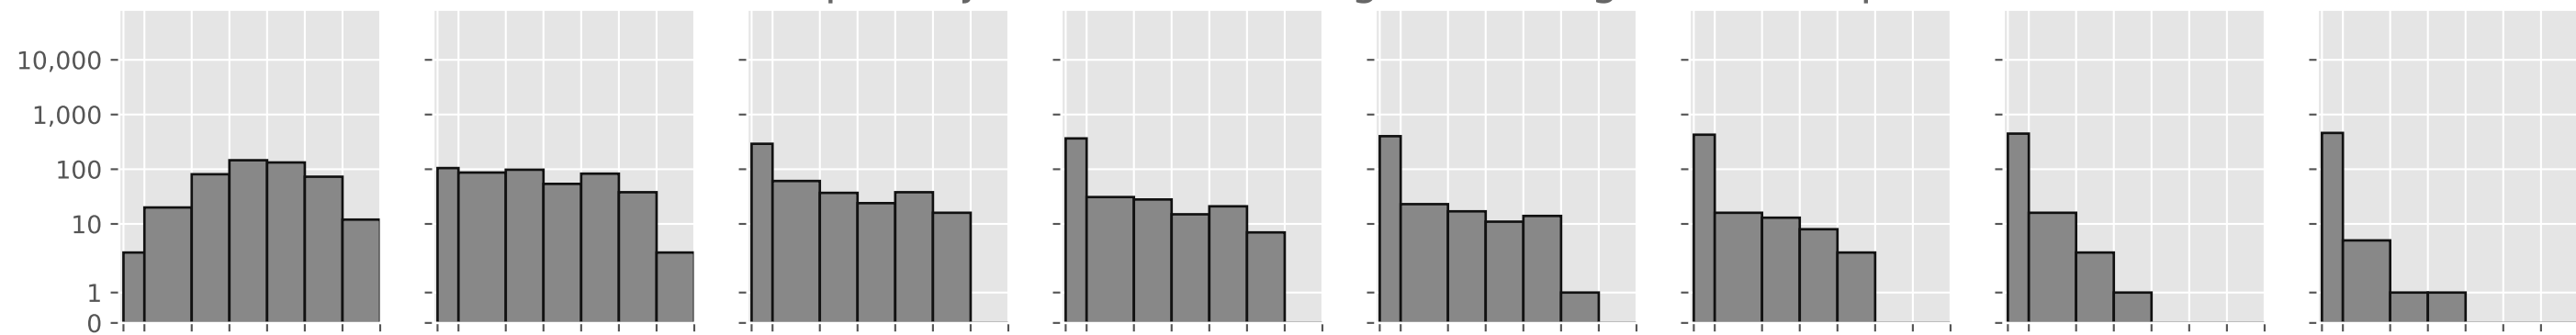

ChickenGut (all 17,073 contigs)

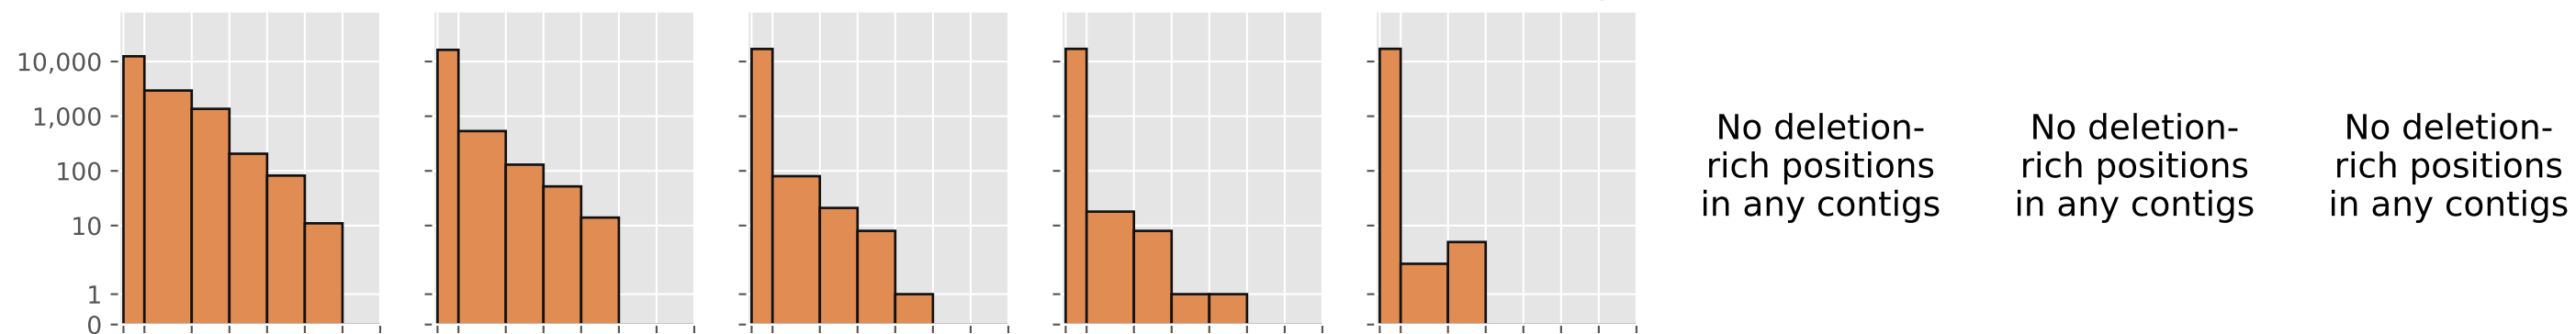

ChickenGut (just the 148 contigs with lengths  $\geq 1$  Mbp)

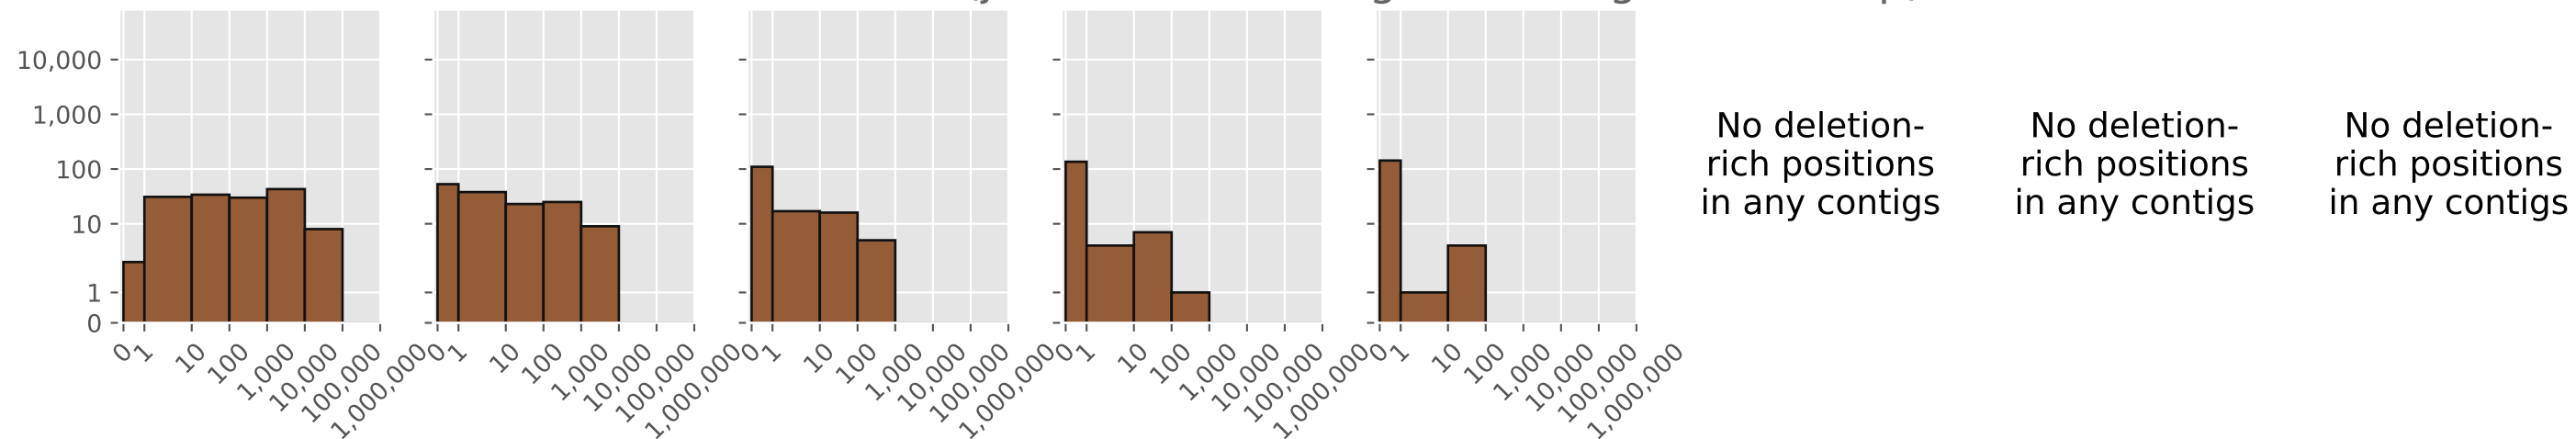

Number of positions with at least  $d$  deletions in a contig
