# Supplementary material for: Analyzing rare mutations in metagenomes assembled using long and accurate reads
Source: HighWire-hosted journal article supplement (doi:10.1101/gr.276917.122), 2022-11-01

# Diversity indices of the 468 contigs with lengths $\geq 1$ Mbp

Number of contigs with diversity indices within a given range

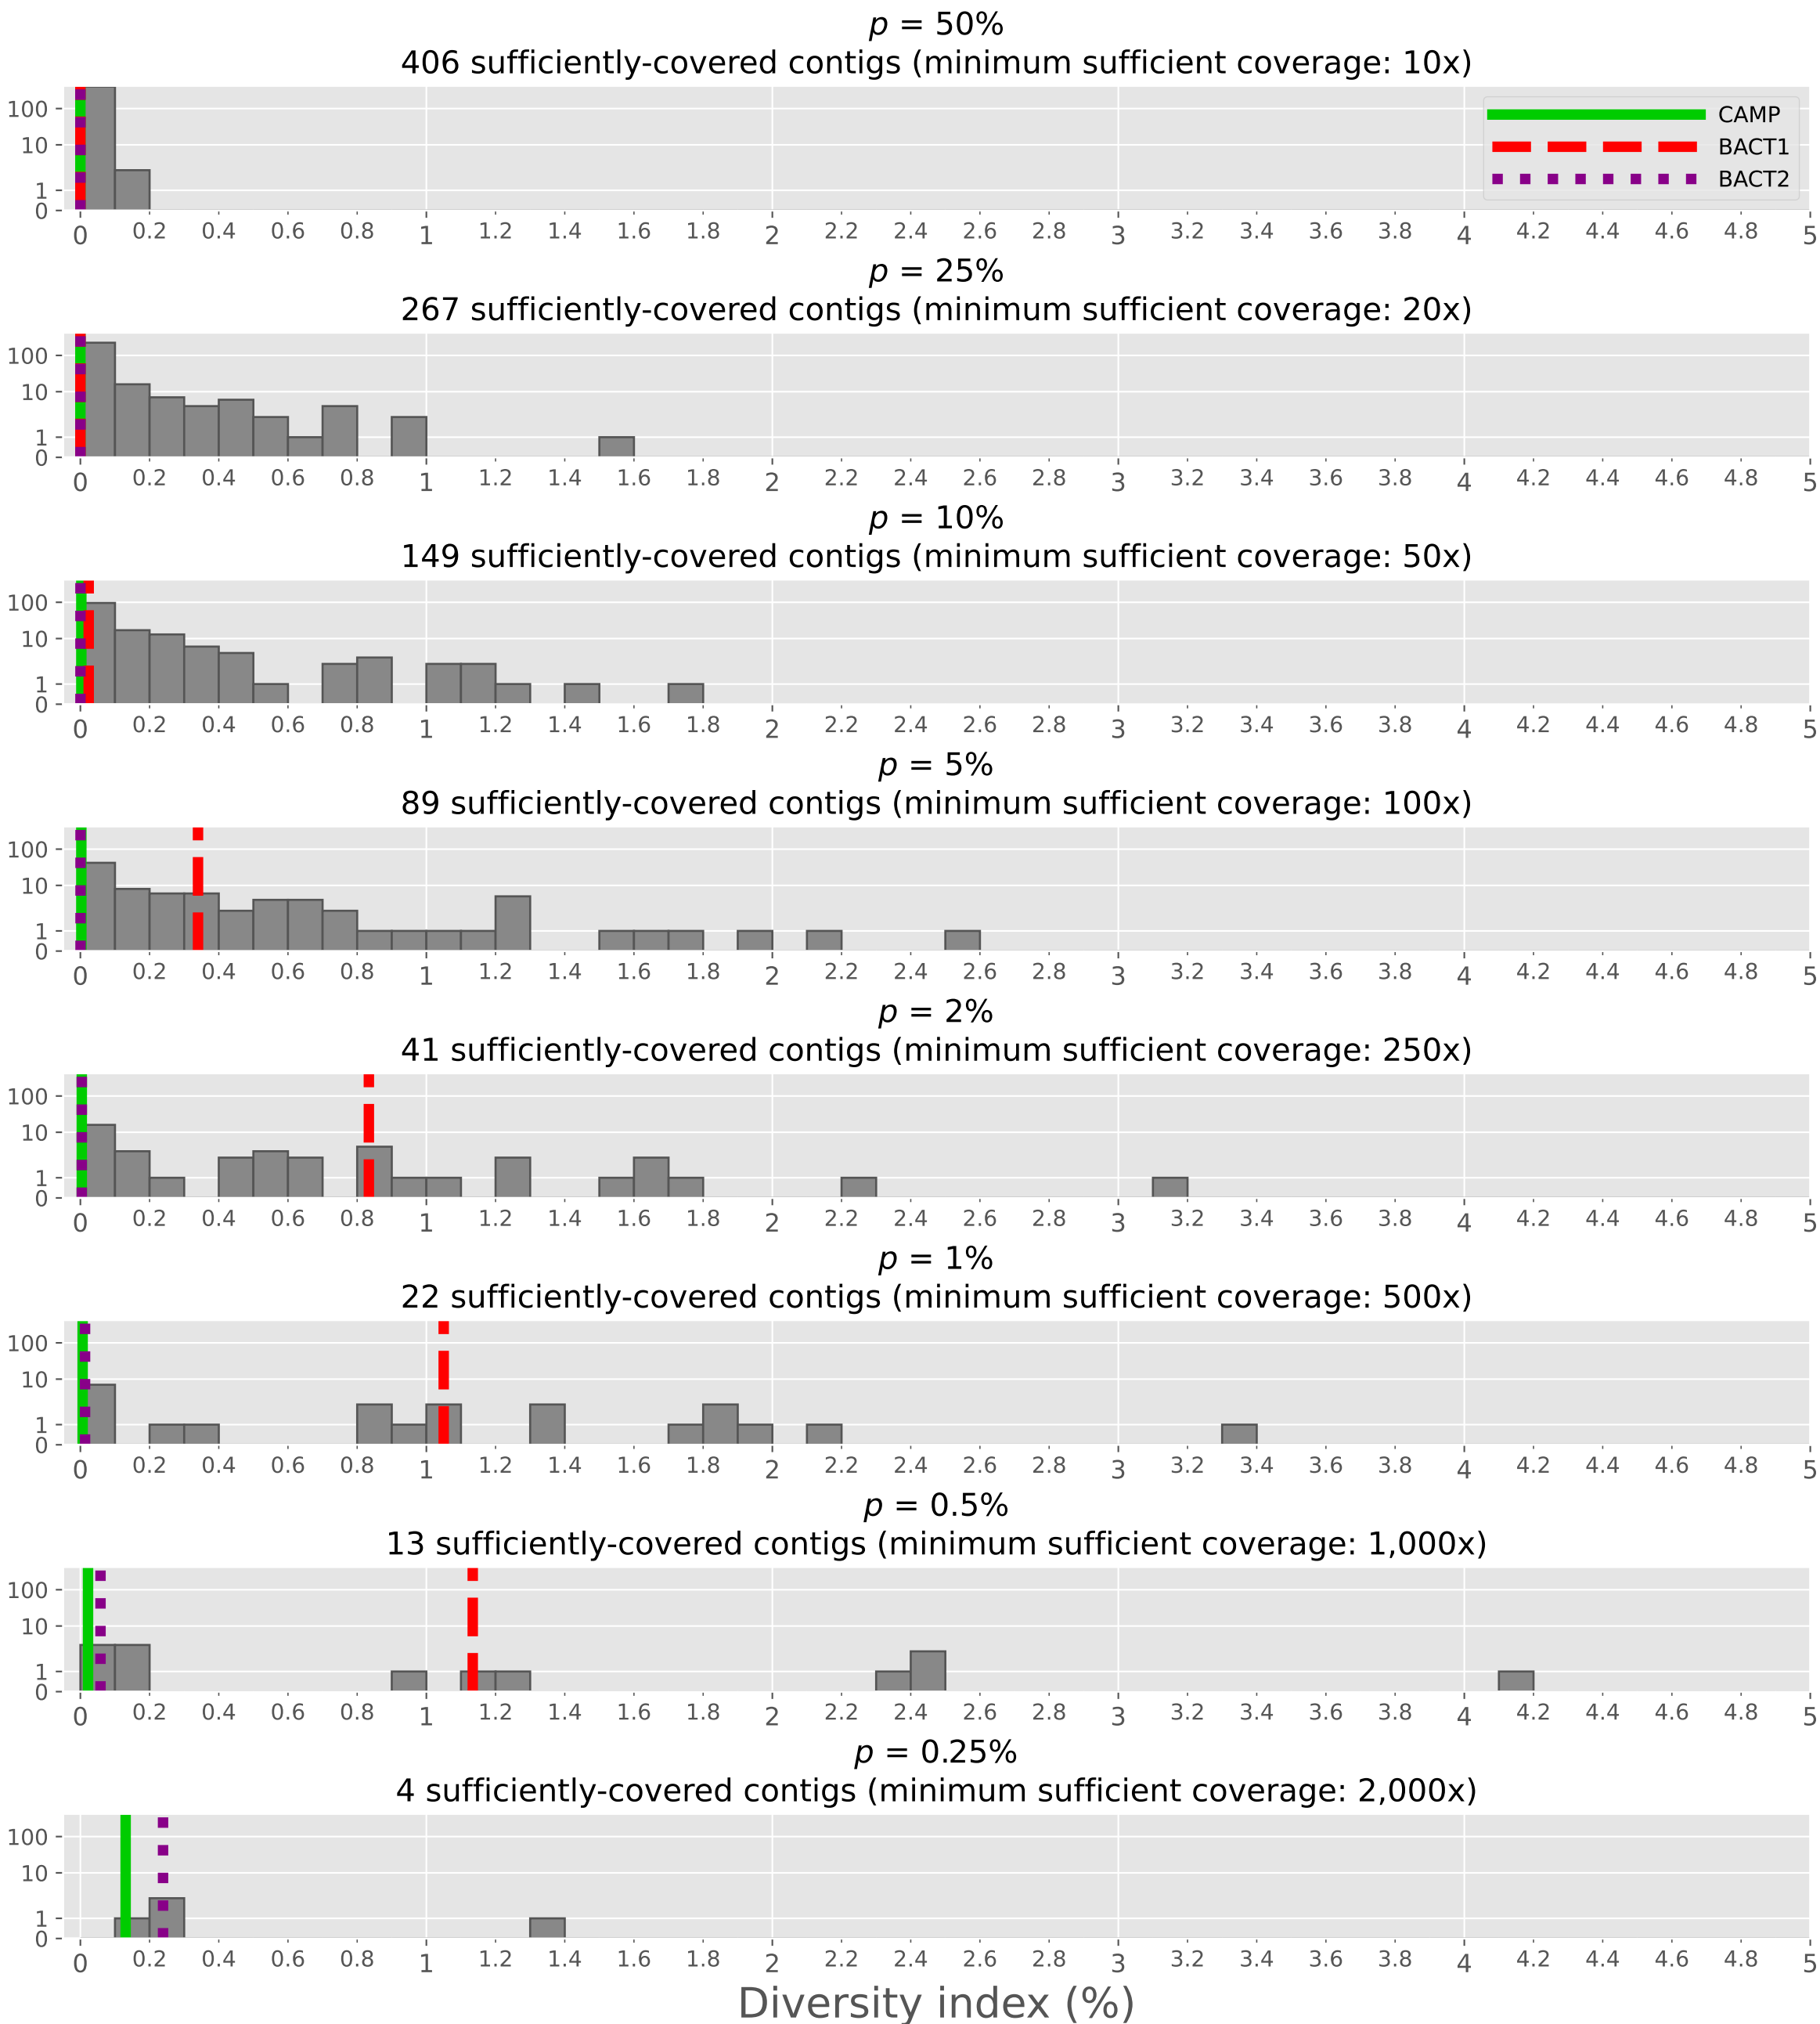

Supplement: Supplemental_Code_S2.zip [file diversity-indices.pdf › sheepgut-main/notebooks/figs/diversity-indices.pdf]
