# Supplementary material for: Analyzing rare mutations in metagenomes assembled using long and accurate reads
Source: HighWire-hosted journal article supplement (doi:10.1101/gr.276917.122), 2022-11-01
Supplement: Supplemental_Code_S2.zip [file gene_coverages.pdf › sheepgut-main/notebooks/figs/gene_coverages.pdf]

# Coverages of three highly-mutated genes

CAMP: Gene #1217

Left end 1,208,927, right end 1,210,075 (length 1,149 bp), strand +  
Coverage ranges from 4,381x to 4,570x (average: 4,519.93x)

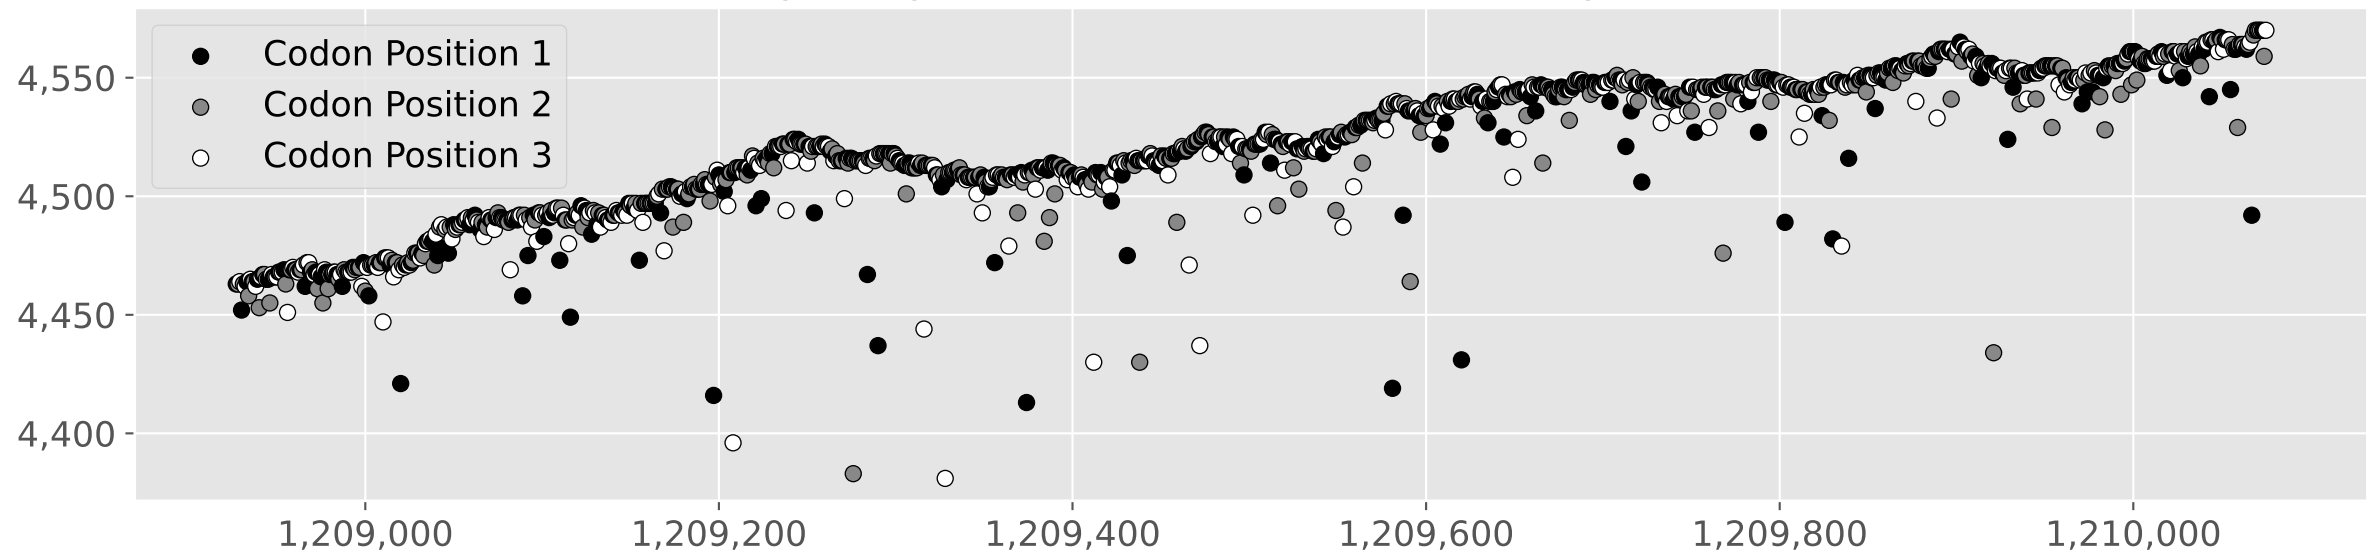

BACT1: Gene #868

Left end 1,041,656, right end 1,042,084 (length 429 bp), strand +  
Coverage ranges from 1,225x to 1,341x (average: 1,296.73x)

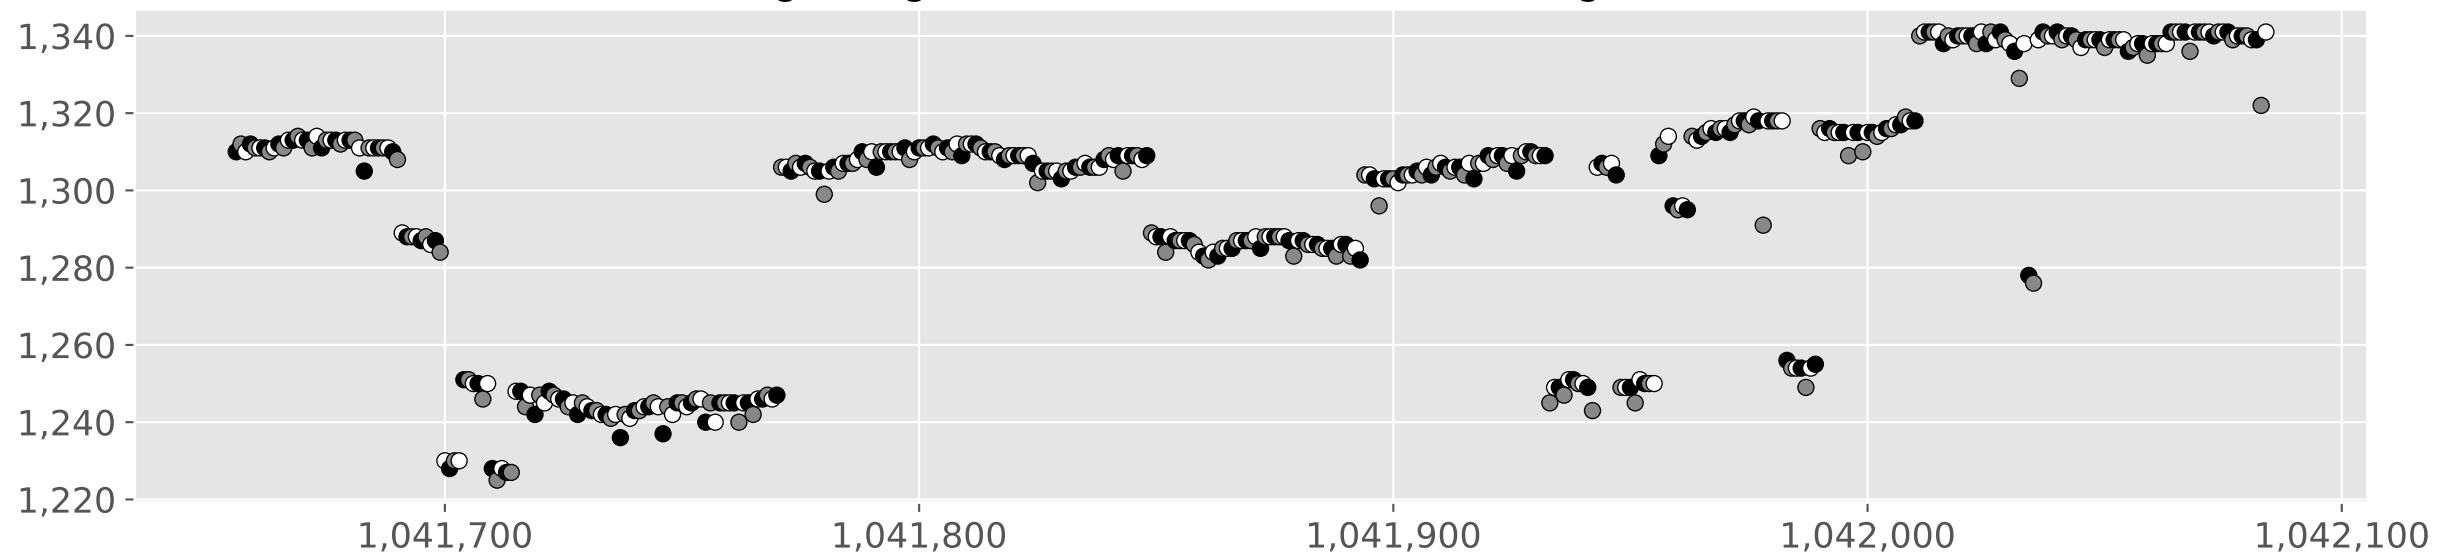

BACT2: Gene #2561

Left end 2,797,869, right end 2,798,756 (length 888 bp), strand -  
Coverage ranges from 3,300x to 3,451x (average: 3,427.71x)

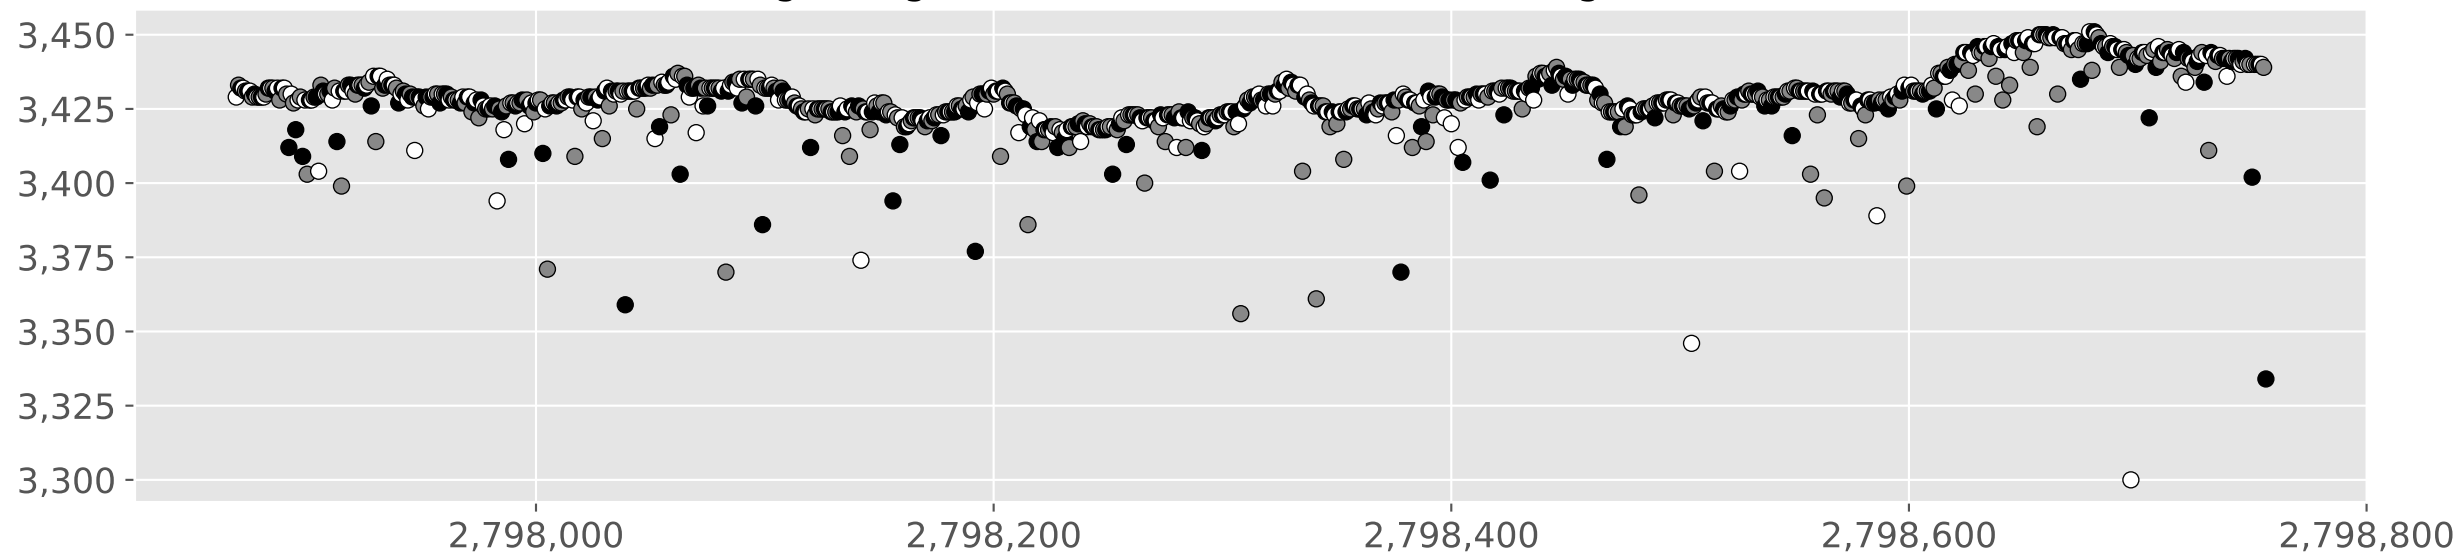

Sequence position (1-indexed)
