# Supplementary material for: Analyzing rare mutations in metagenomes assembled using long and accurate reads
Source: HighWire-hosted journal article supplement (doi:10.1101/gr.276917.122), 2022-11-01
Supplement: Supplemental_Code_S2.zip [file gene_mutation_spectra.pdf › sheepgut-main/notebooks/figs/gene_mutation_spectra.pdf]

# Mutation spectra of three highly-mutated genes

## CAMP: Gene #1217

Left end 1,208,927, right end 1,210,075 (length 1,149 bp), strand +  
Mutation spectrum ranges from 0.00% to 16.17% (average = 0.49%)

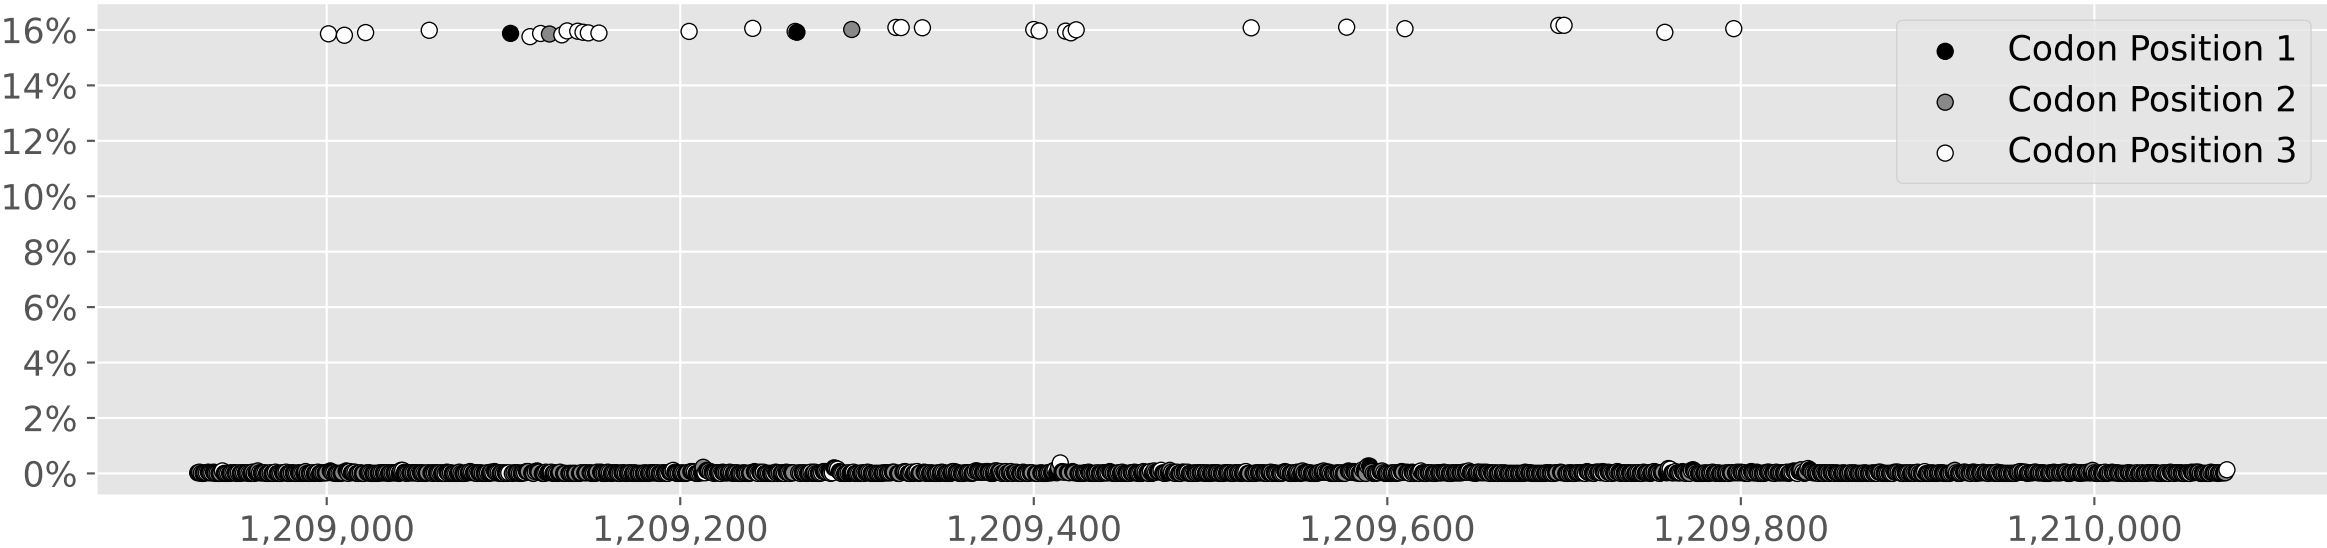

## BACT1: Gene #868

Left end 1,041,656, right end 1,042,084 (length 429 bp), strand +  
Mutation spectrum ranges from 0.00% to 8.14% (average = 0.71%)

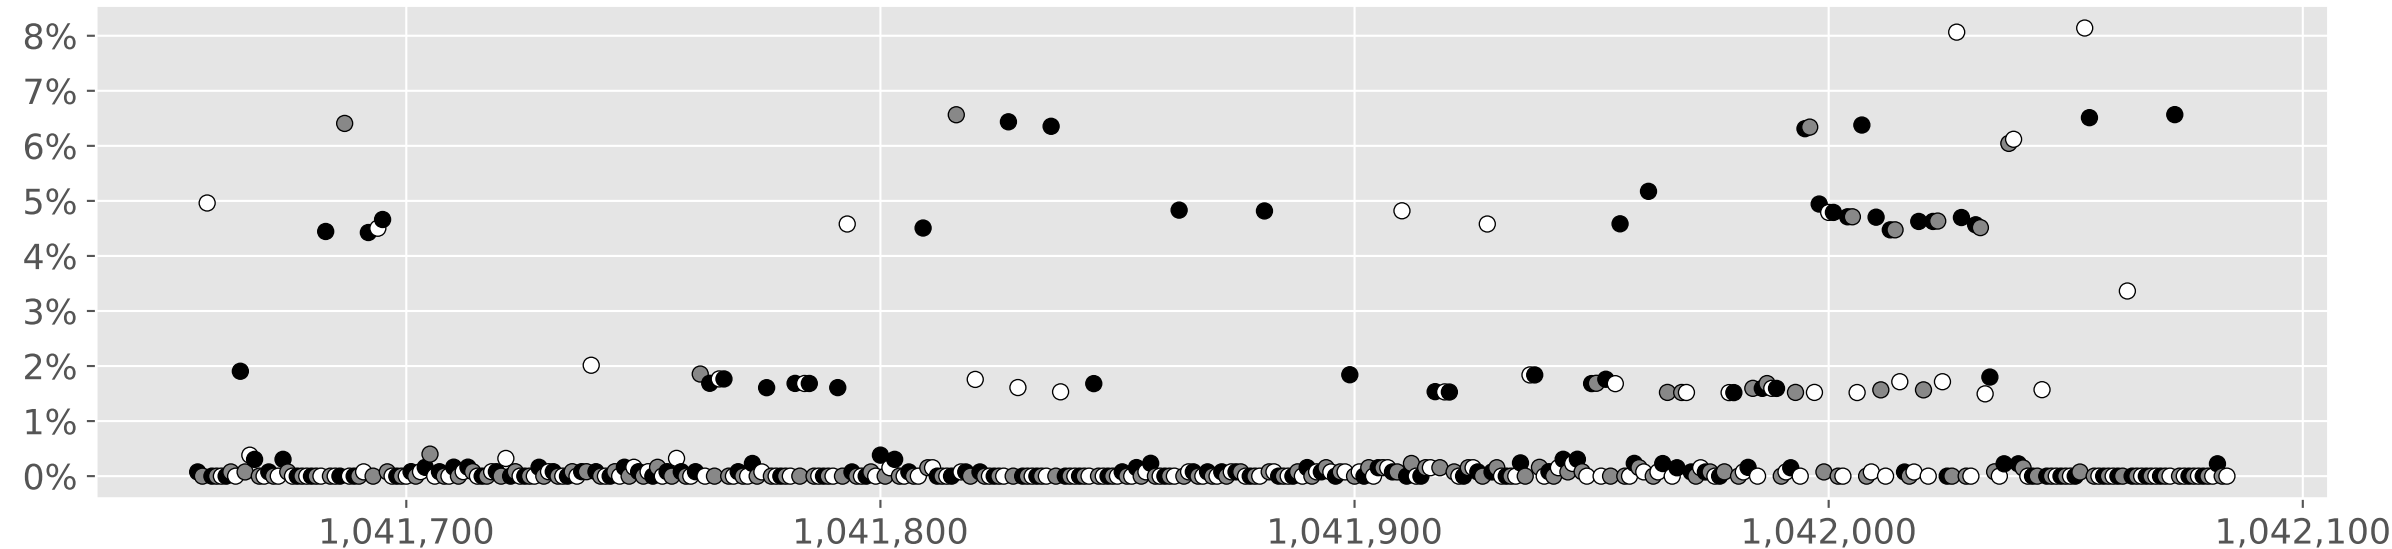

## BACT2: Gene #2561

Left end 2,797,869, right end 2,798,756 (length 888 bp), strand -  
Mutation spectrum ranges from 0.00% to 0.67% (average = 0.05%)

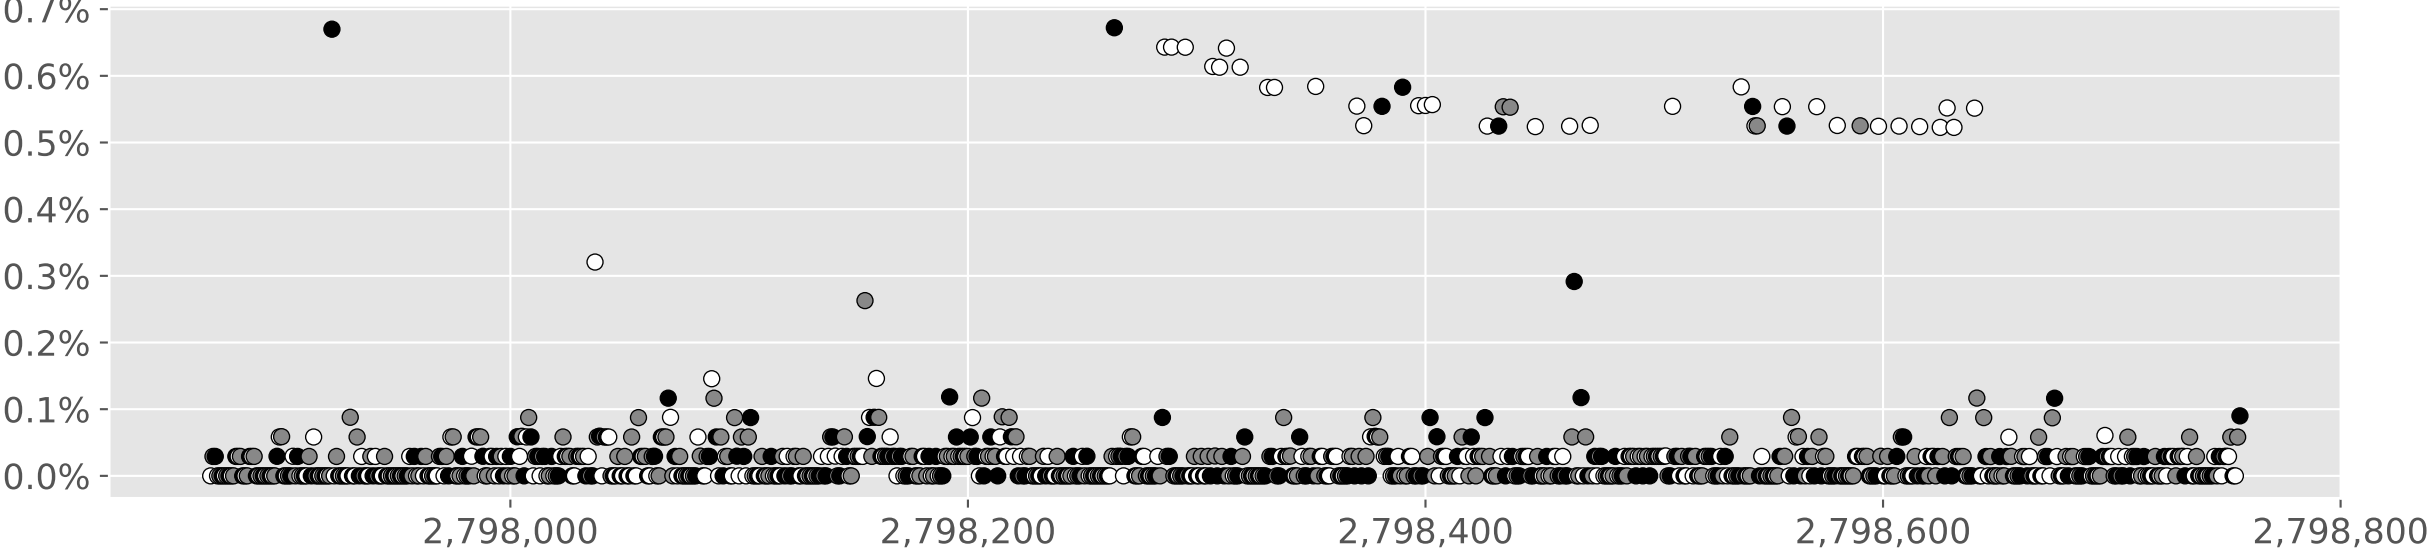

Sequence position (1-indexed)
