# Supplementary material for: Analyzing rare mutations in metagenomes assembled using long and accurate reads
Source: HighWire-hosted journal article supplement (doi:10.1101/gr.276917.122), 2022-11-01
Supplement: Supplemental_Code_S2.zip [file normalized-cp-hists.pdf › sheepgut-main/notebooks/figs/normalized-cp-hists.pdf]

# Rare mutation frequencies across codon positions (each bar normalized by total number of positions in that category)

Number of Mutated Positions  
Number of Positions

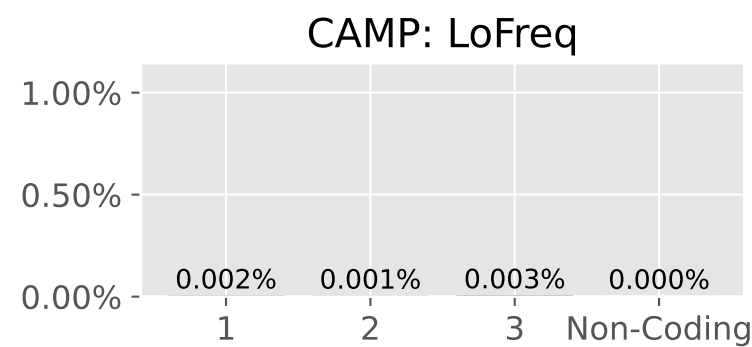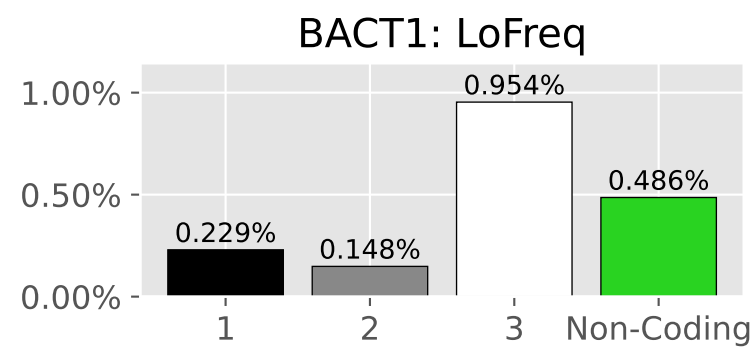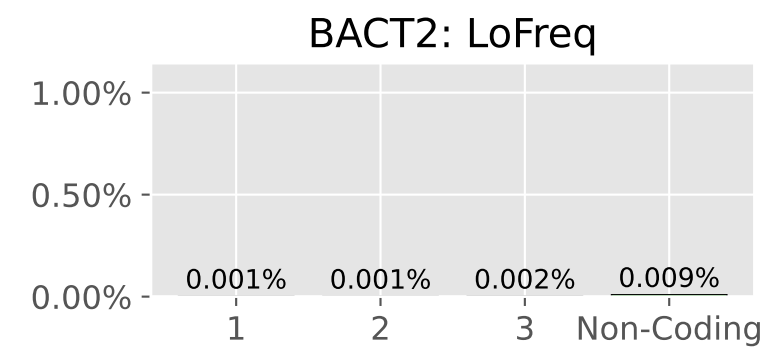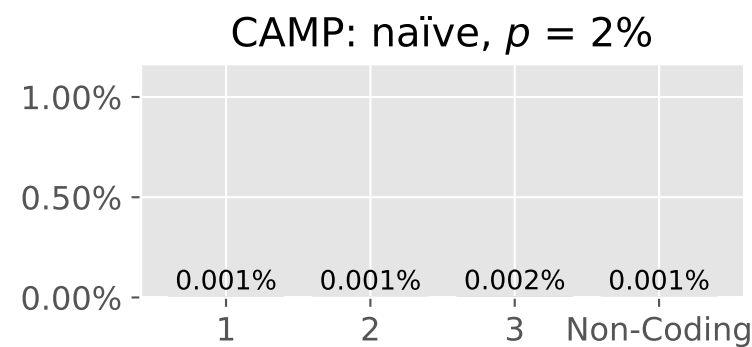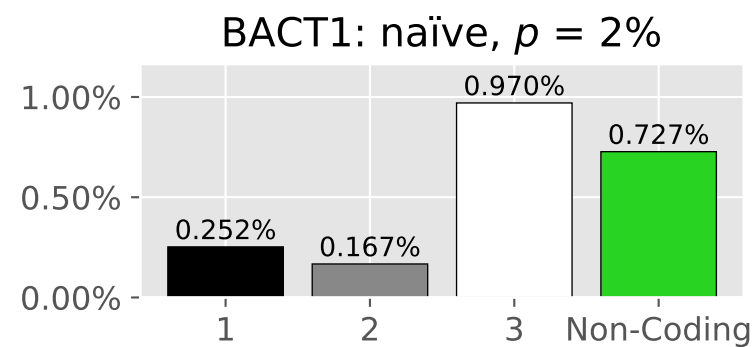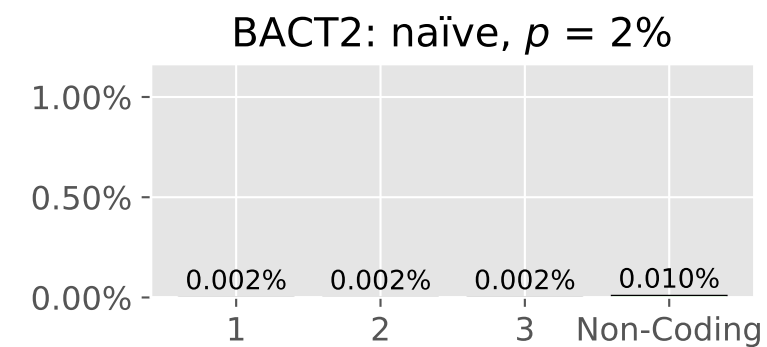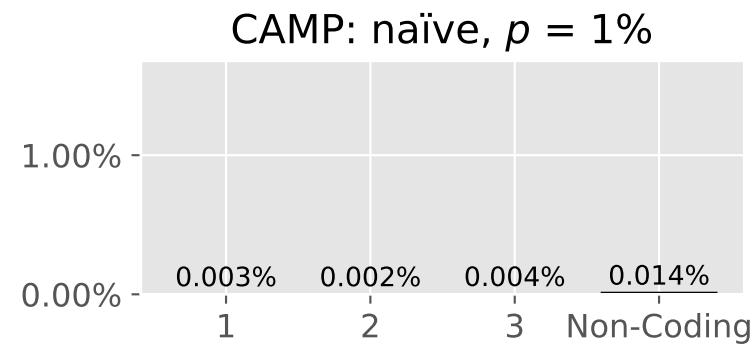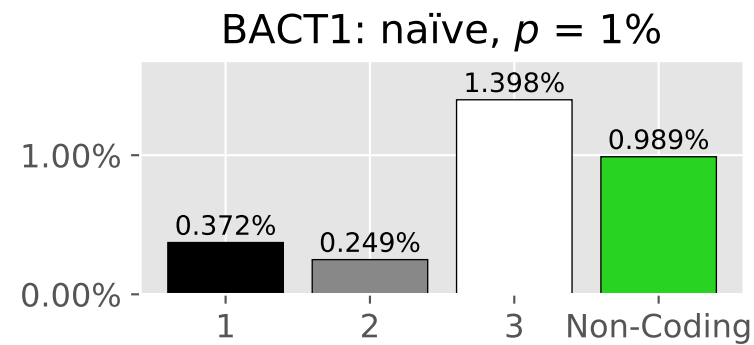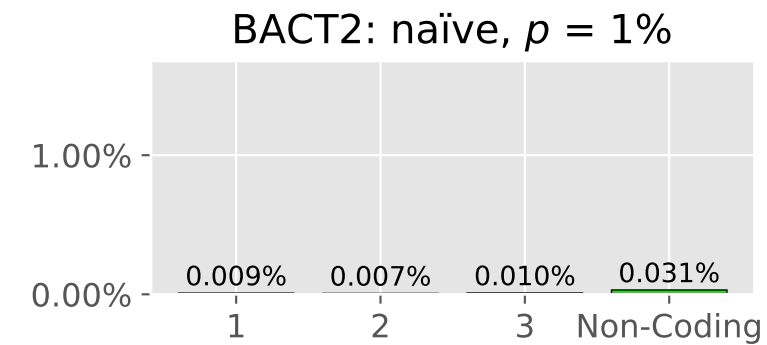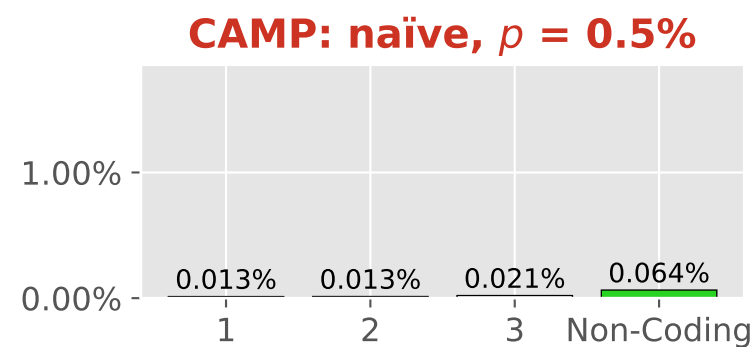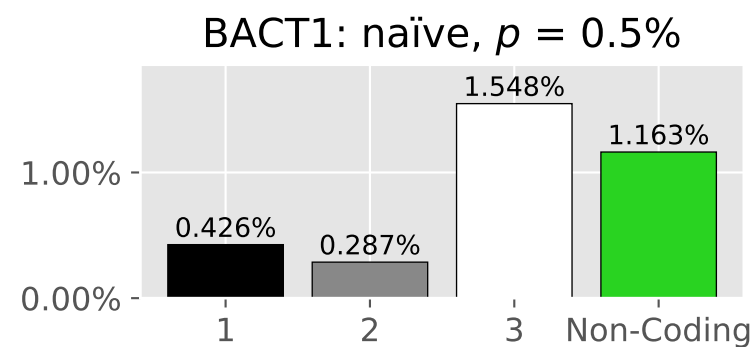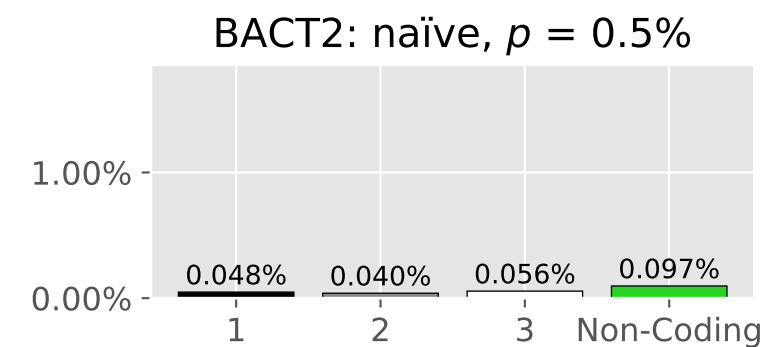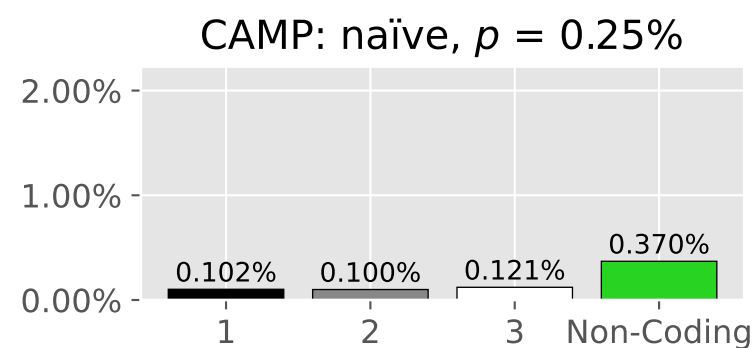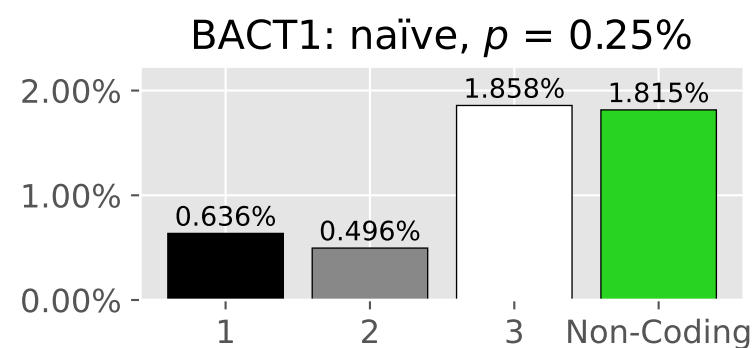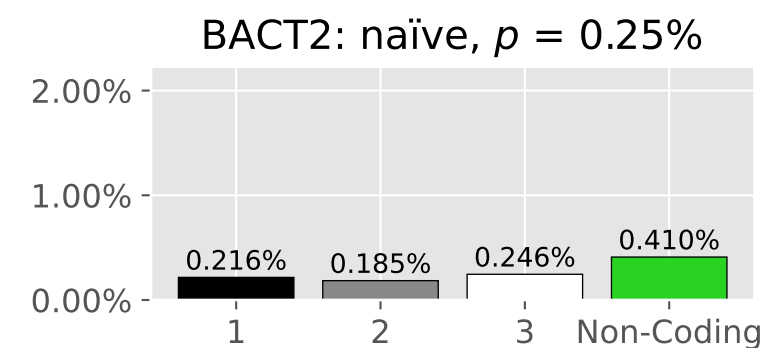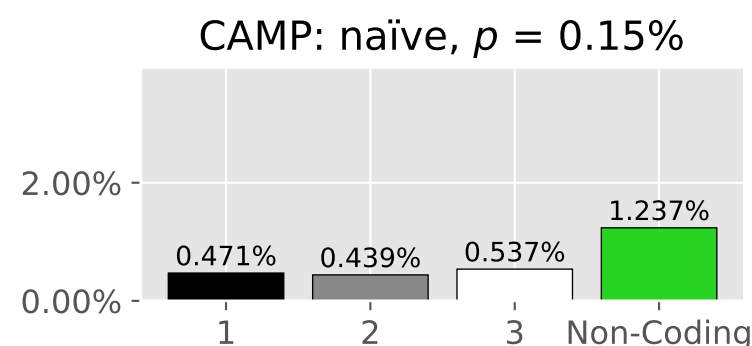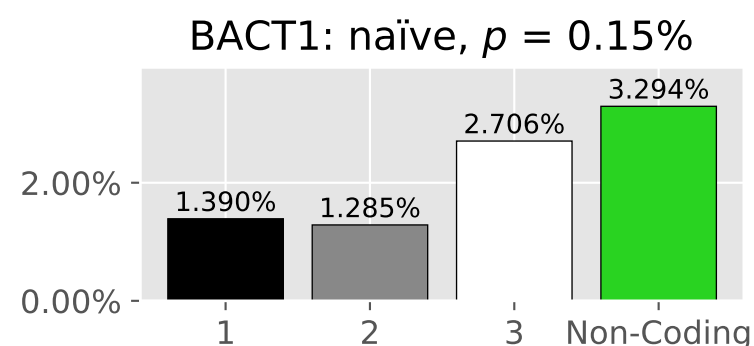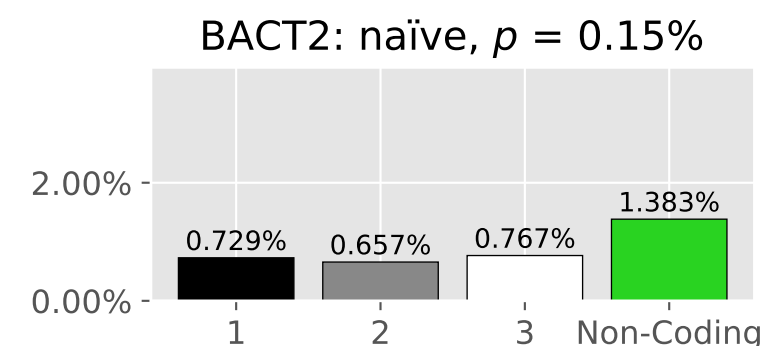

Codon Position
