# Supplementary material for: Analyzing rare mutations in metagenomes assembled using long and accurate reads
Source: HighWire-hosted journal article supplement (doi:10.1101/gr.276917.122), 2022-11-01
Supplement: Supplemental_Code_S2.zip [file seq-covskew.pdf › sheepgut-main/notebooks/figs/seq-covskew.pdf]

# Coverage and GC skew

- Coverage
- GC skew
- █ Minimum GC skew
- █ Maximum GC skew

CAMP

CAMP Gene 1217

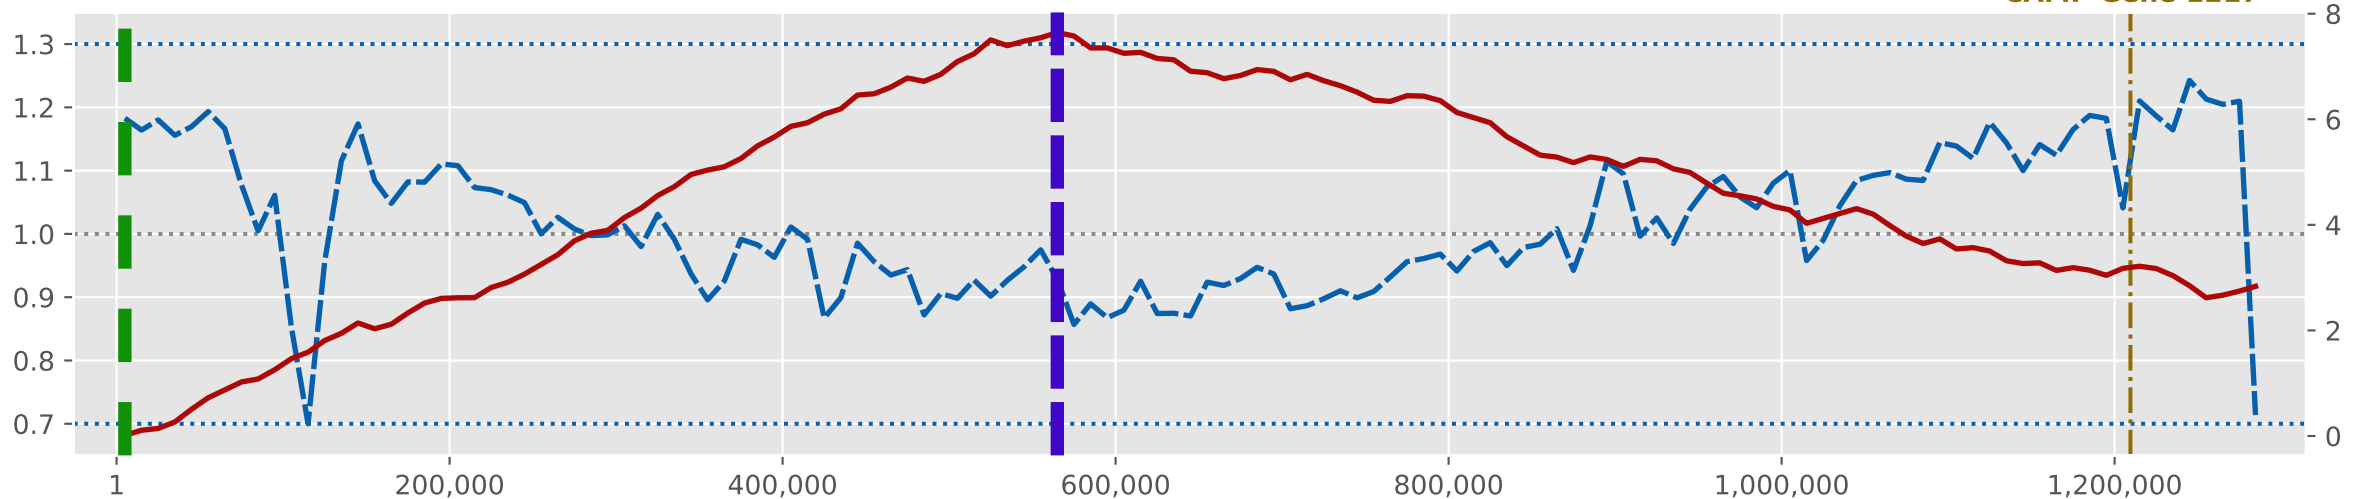

BACT1

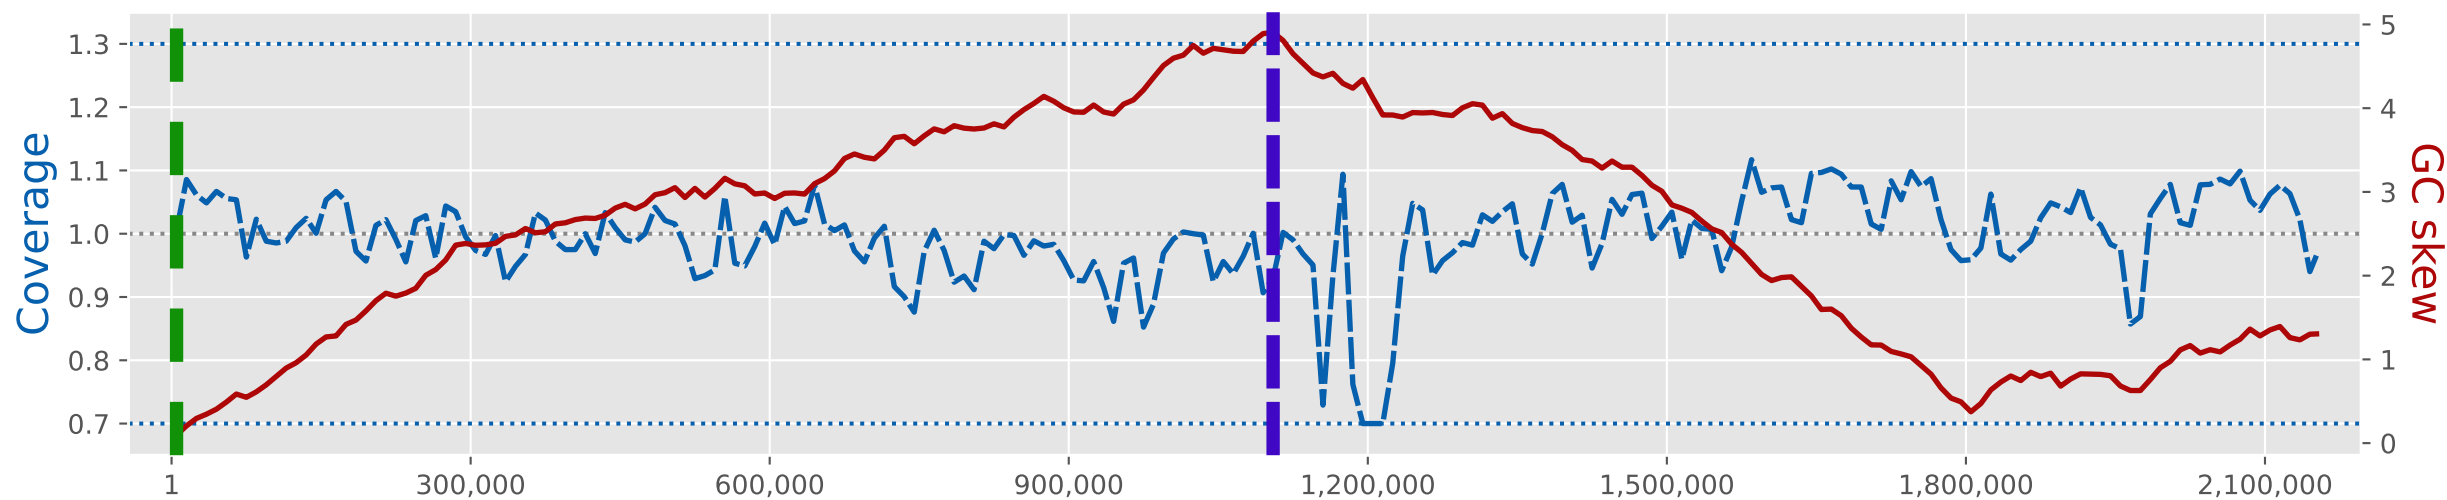

BACT2

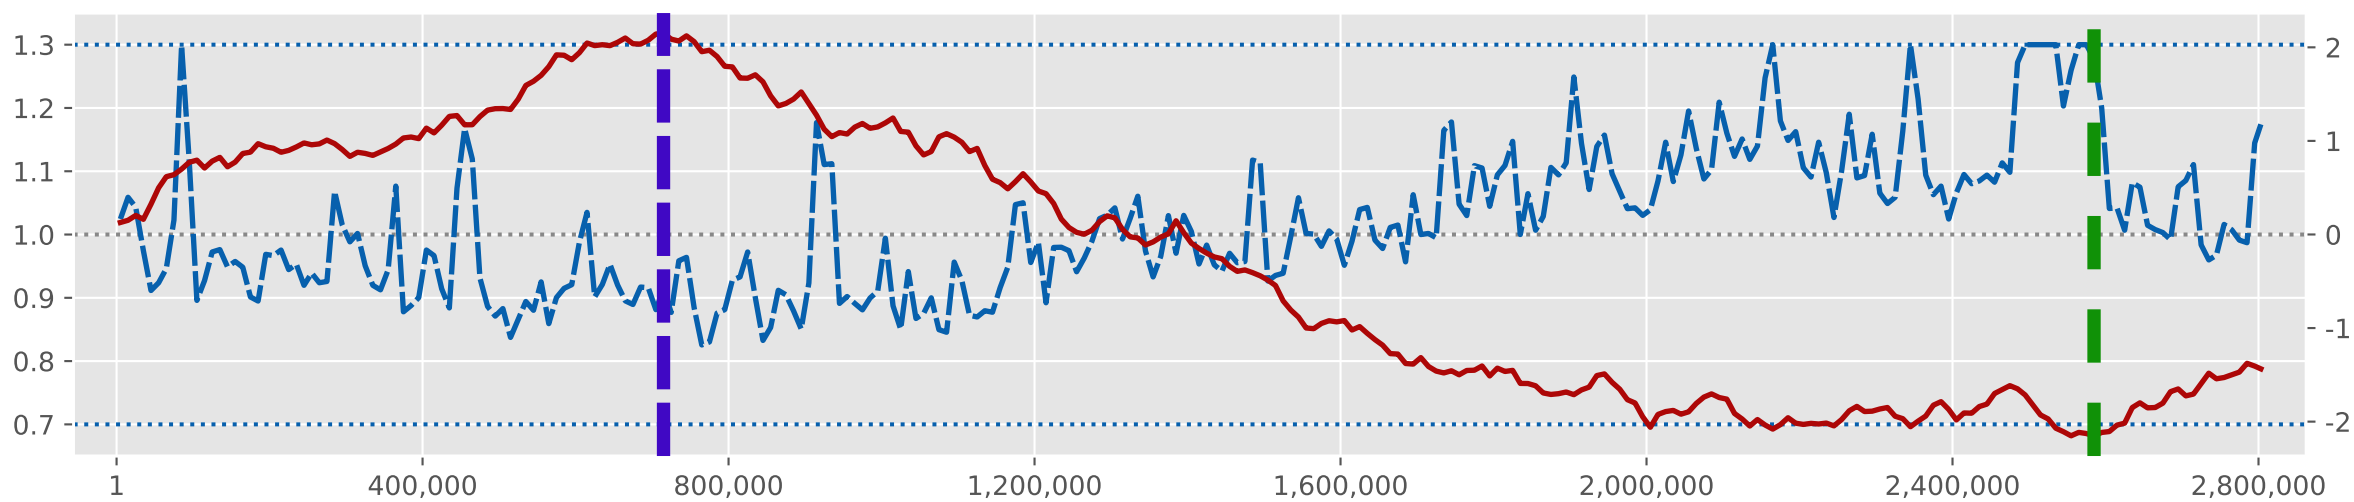

Sequence position
