# Supplementary material for: Analyzing rare mutations in metagenomes assembled using long and accurate reads
Source: HighWire-hosted journal article supplement (doi:10.1101/gr.276917.122), 2022-11-01
Supplement: Supplemental_Code_S2.zip [file sheepgut_fdr_curves.pdf › sheepgut-main/notebooks/figs/sheepgut_fdr_curves.pdf]

FDR curves for naïve  $p$ -mutation calling ( $p = 4.99\%$  to  $p = 0.15\%$ ),  
using the 8 highest-diversity-index ( $p = 0.5\%$ ) target contigs  $\geq 1$  Mbp

Number of called rare ( $p < 5\%$ )  $p$ -mutations per megabase

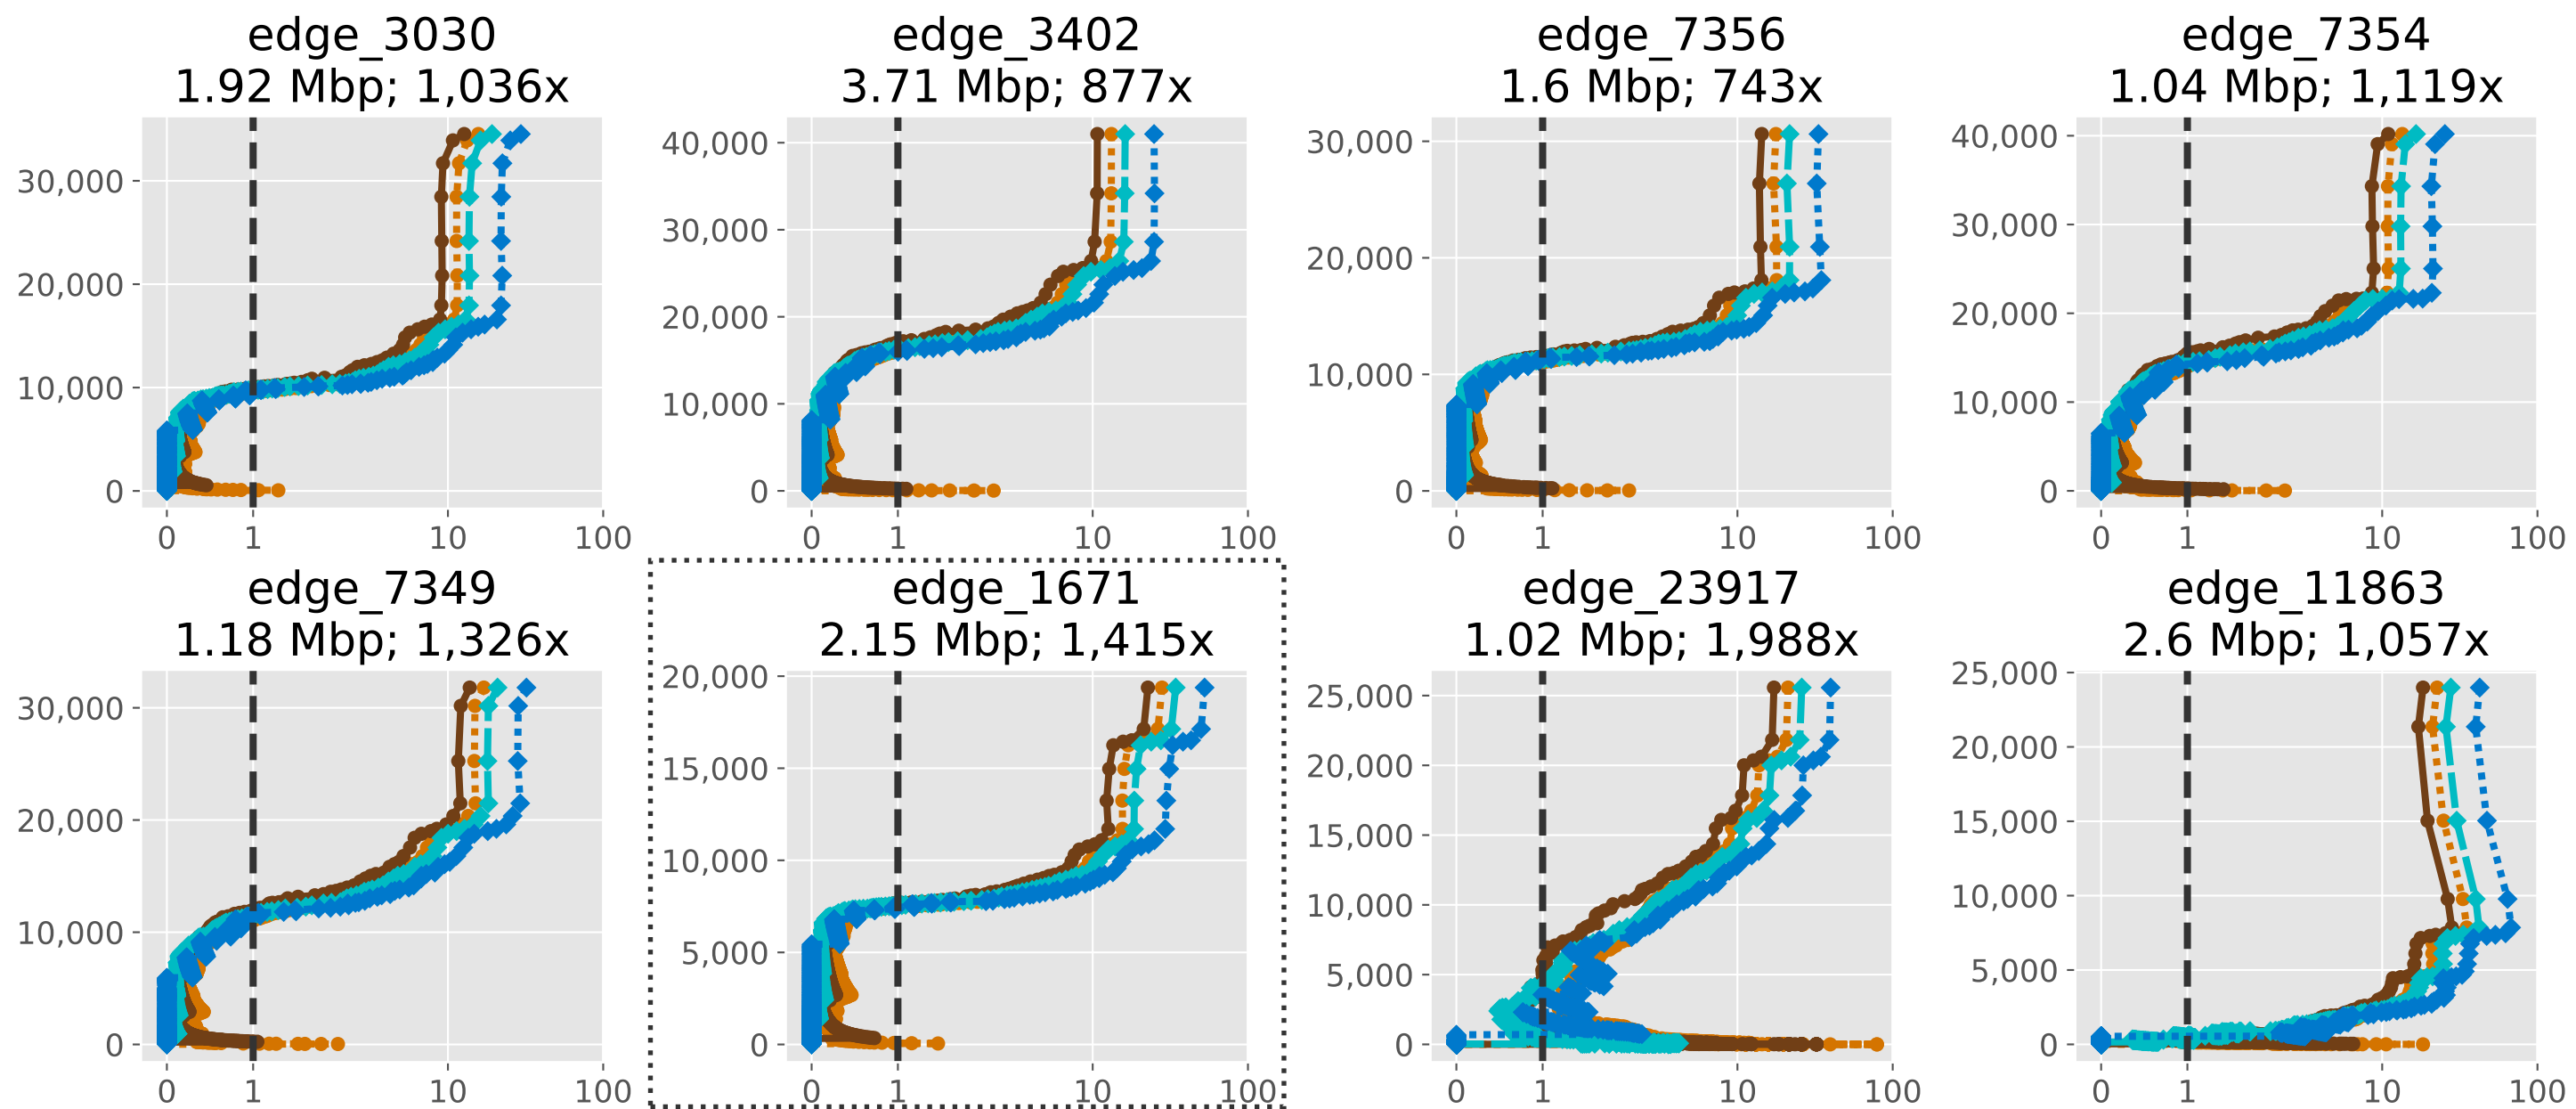

edge\_1671 ("BACT1") FDR curves for 10 decoy contexts

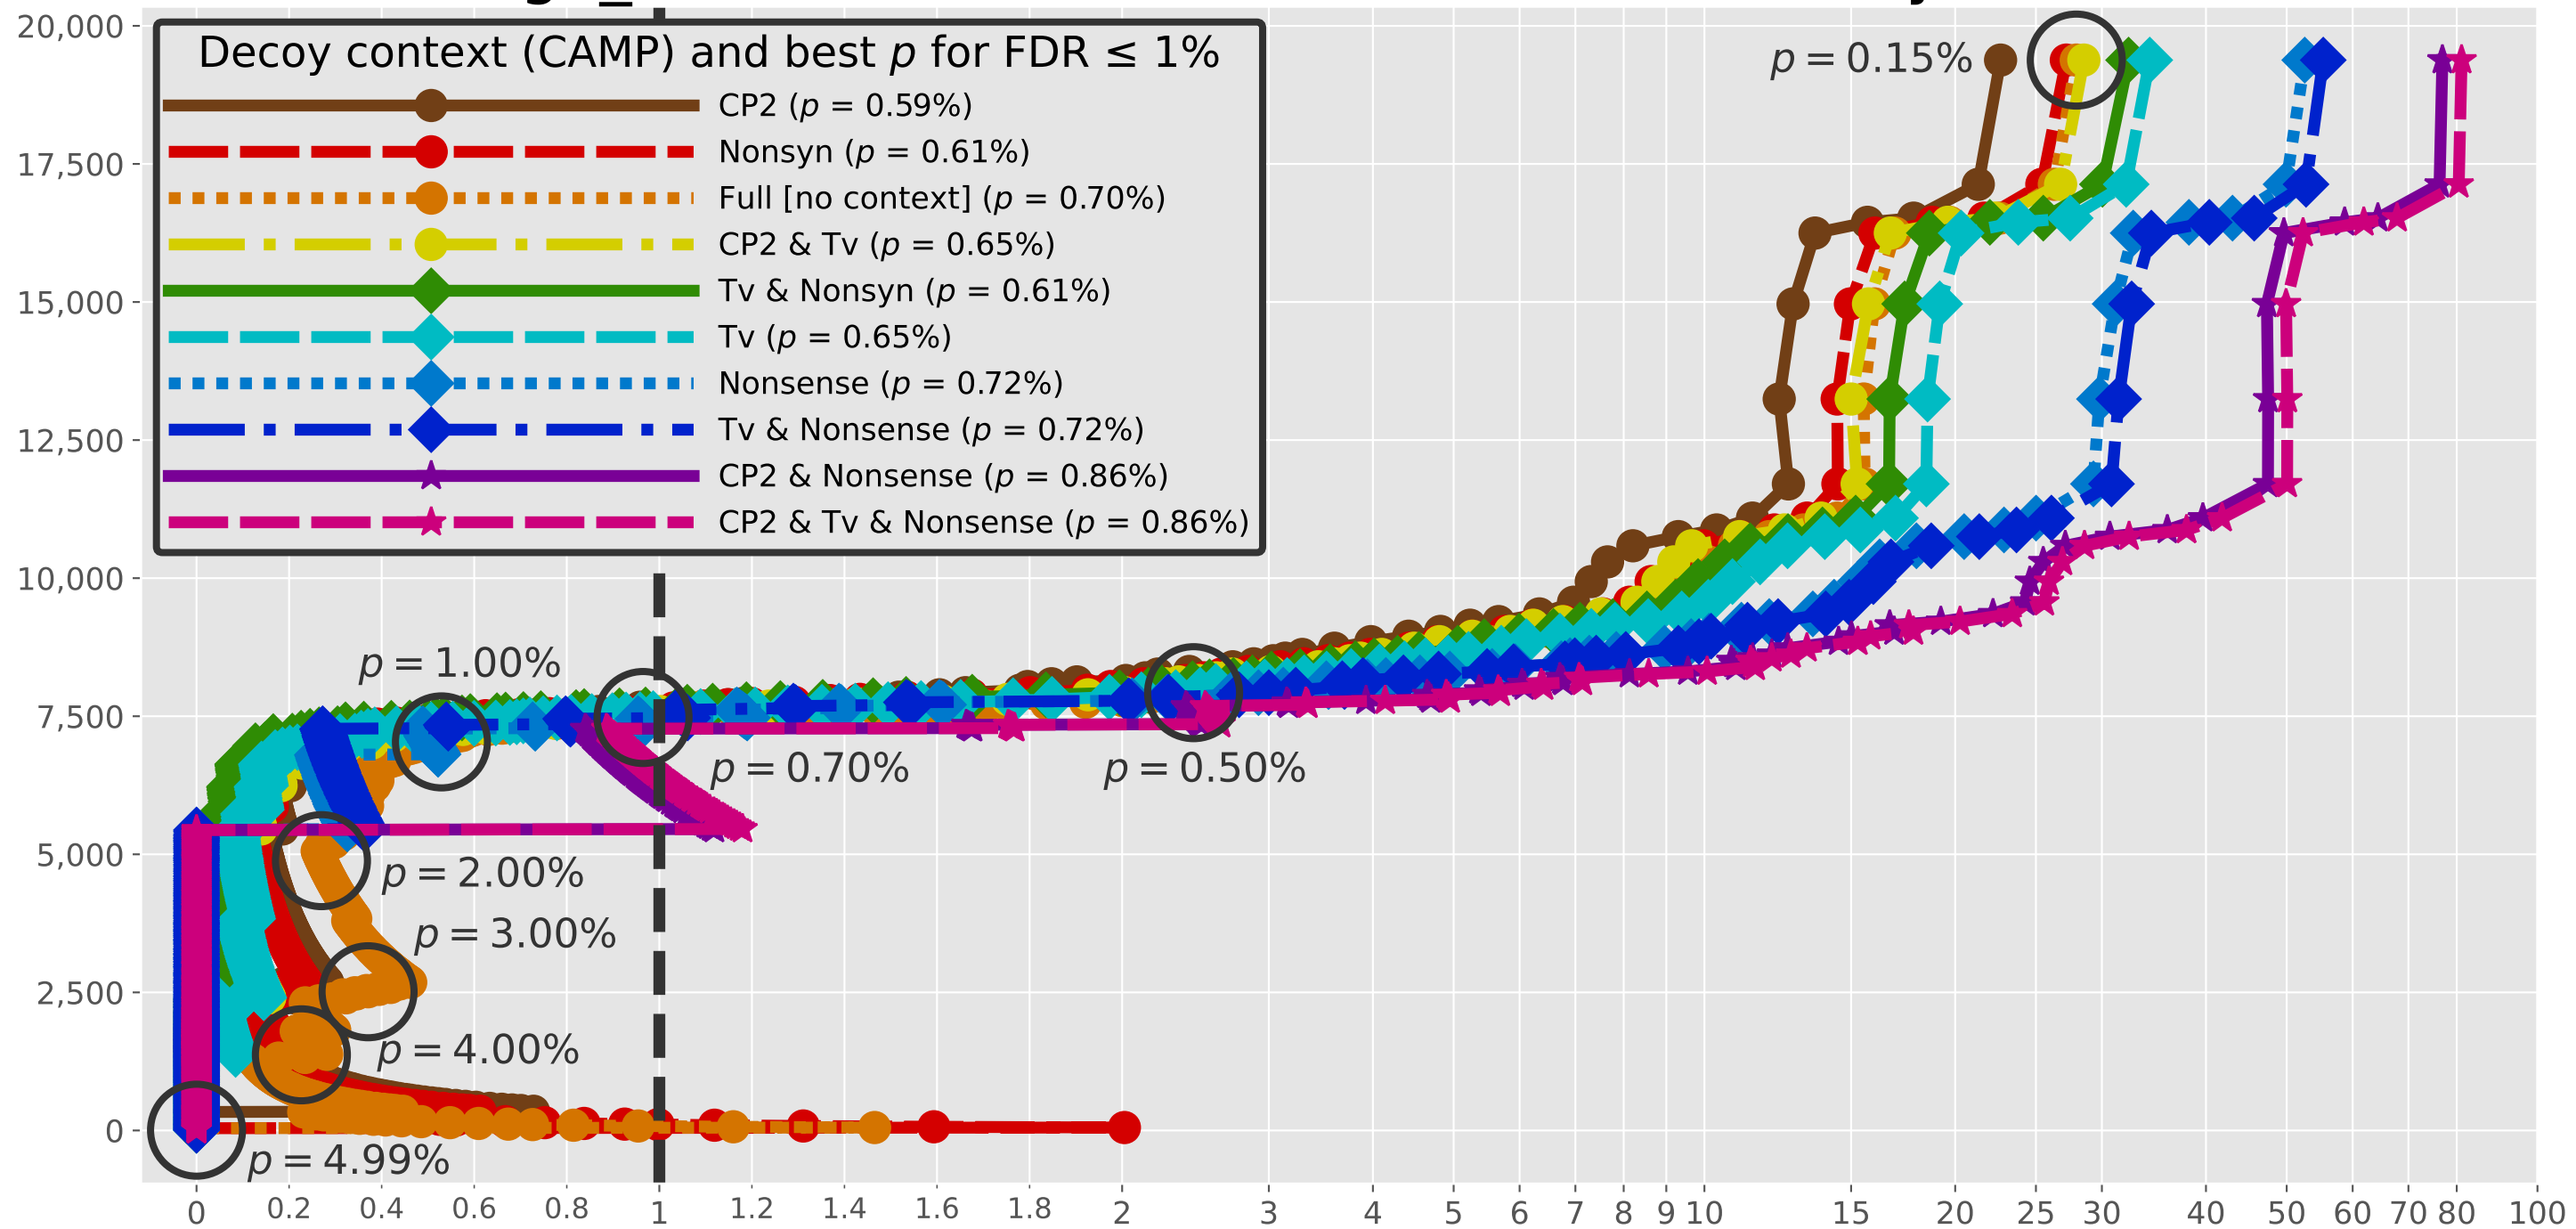

Estimated FDR of called rare ( $p < 5\%$ )  $p$ -mutations (%),  
using a  $\log_{10}$  scale to highlight order-of-magnitude differences
