# Supplementary material for: Analyzing rare mutations in metagenomes assembled using long and accurate reads
Source: HighWire-hosted journal article supplement (doi:10.1101/gr.276917.122), 2022-11-01

FDR curves for naïve  $r$ -mutation calling ( $r = 99$  to  $r = 3$ ),  
using the 8 highest-diversity-index ( $p = 0.5\%$ ) target contigs  $\geq 1$  Mbp

Number of called rare ( $r < 100$ )  $r$ -mutations per megabase

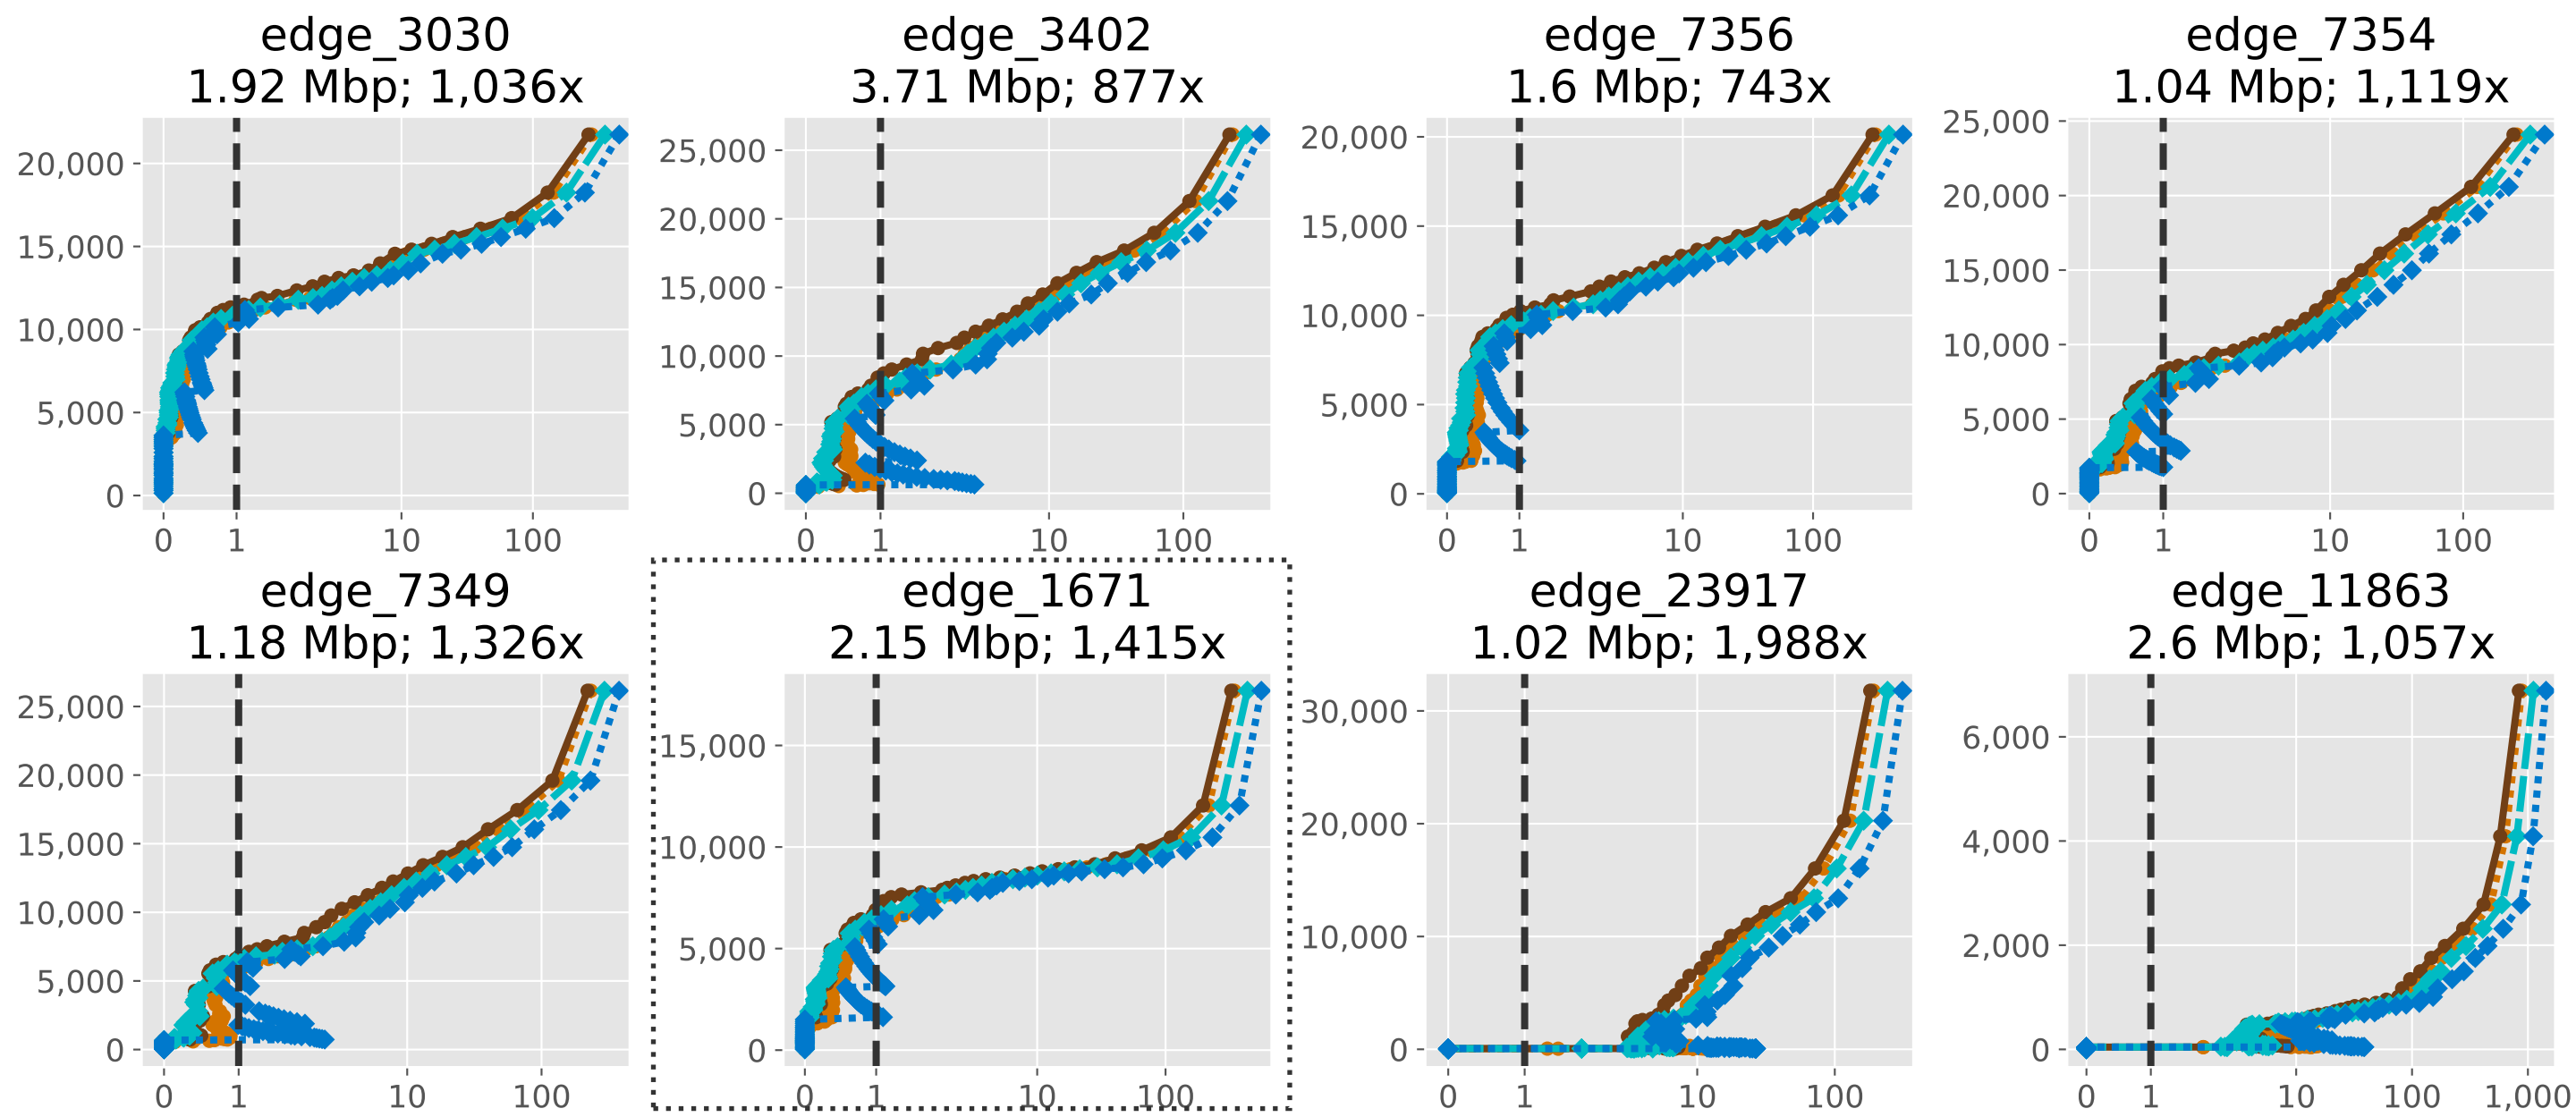

edge\_1671 ("BACT1") FDR curves for 10 decoy contexts

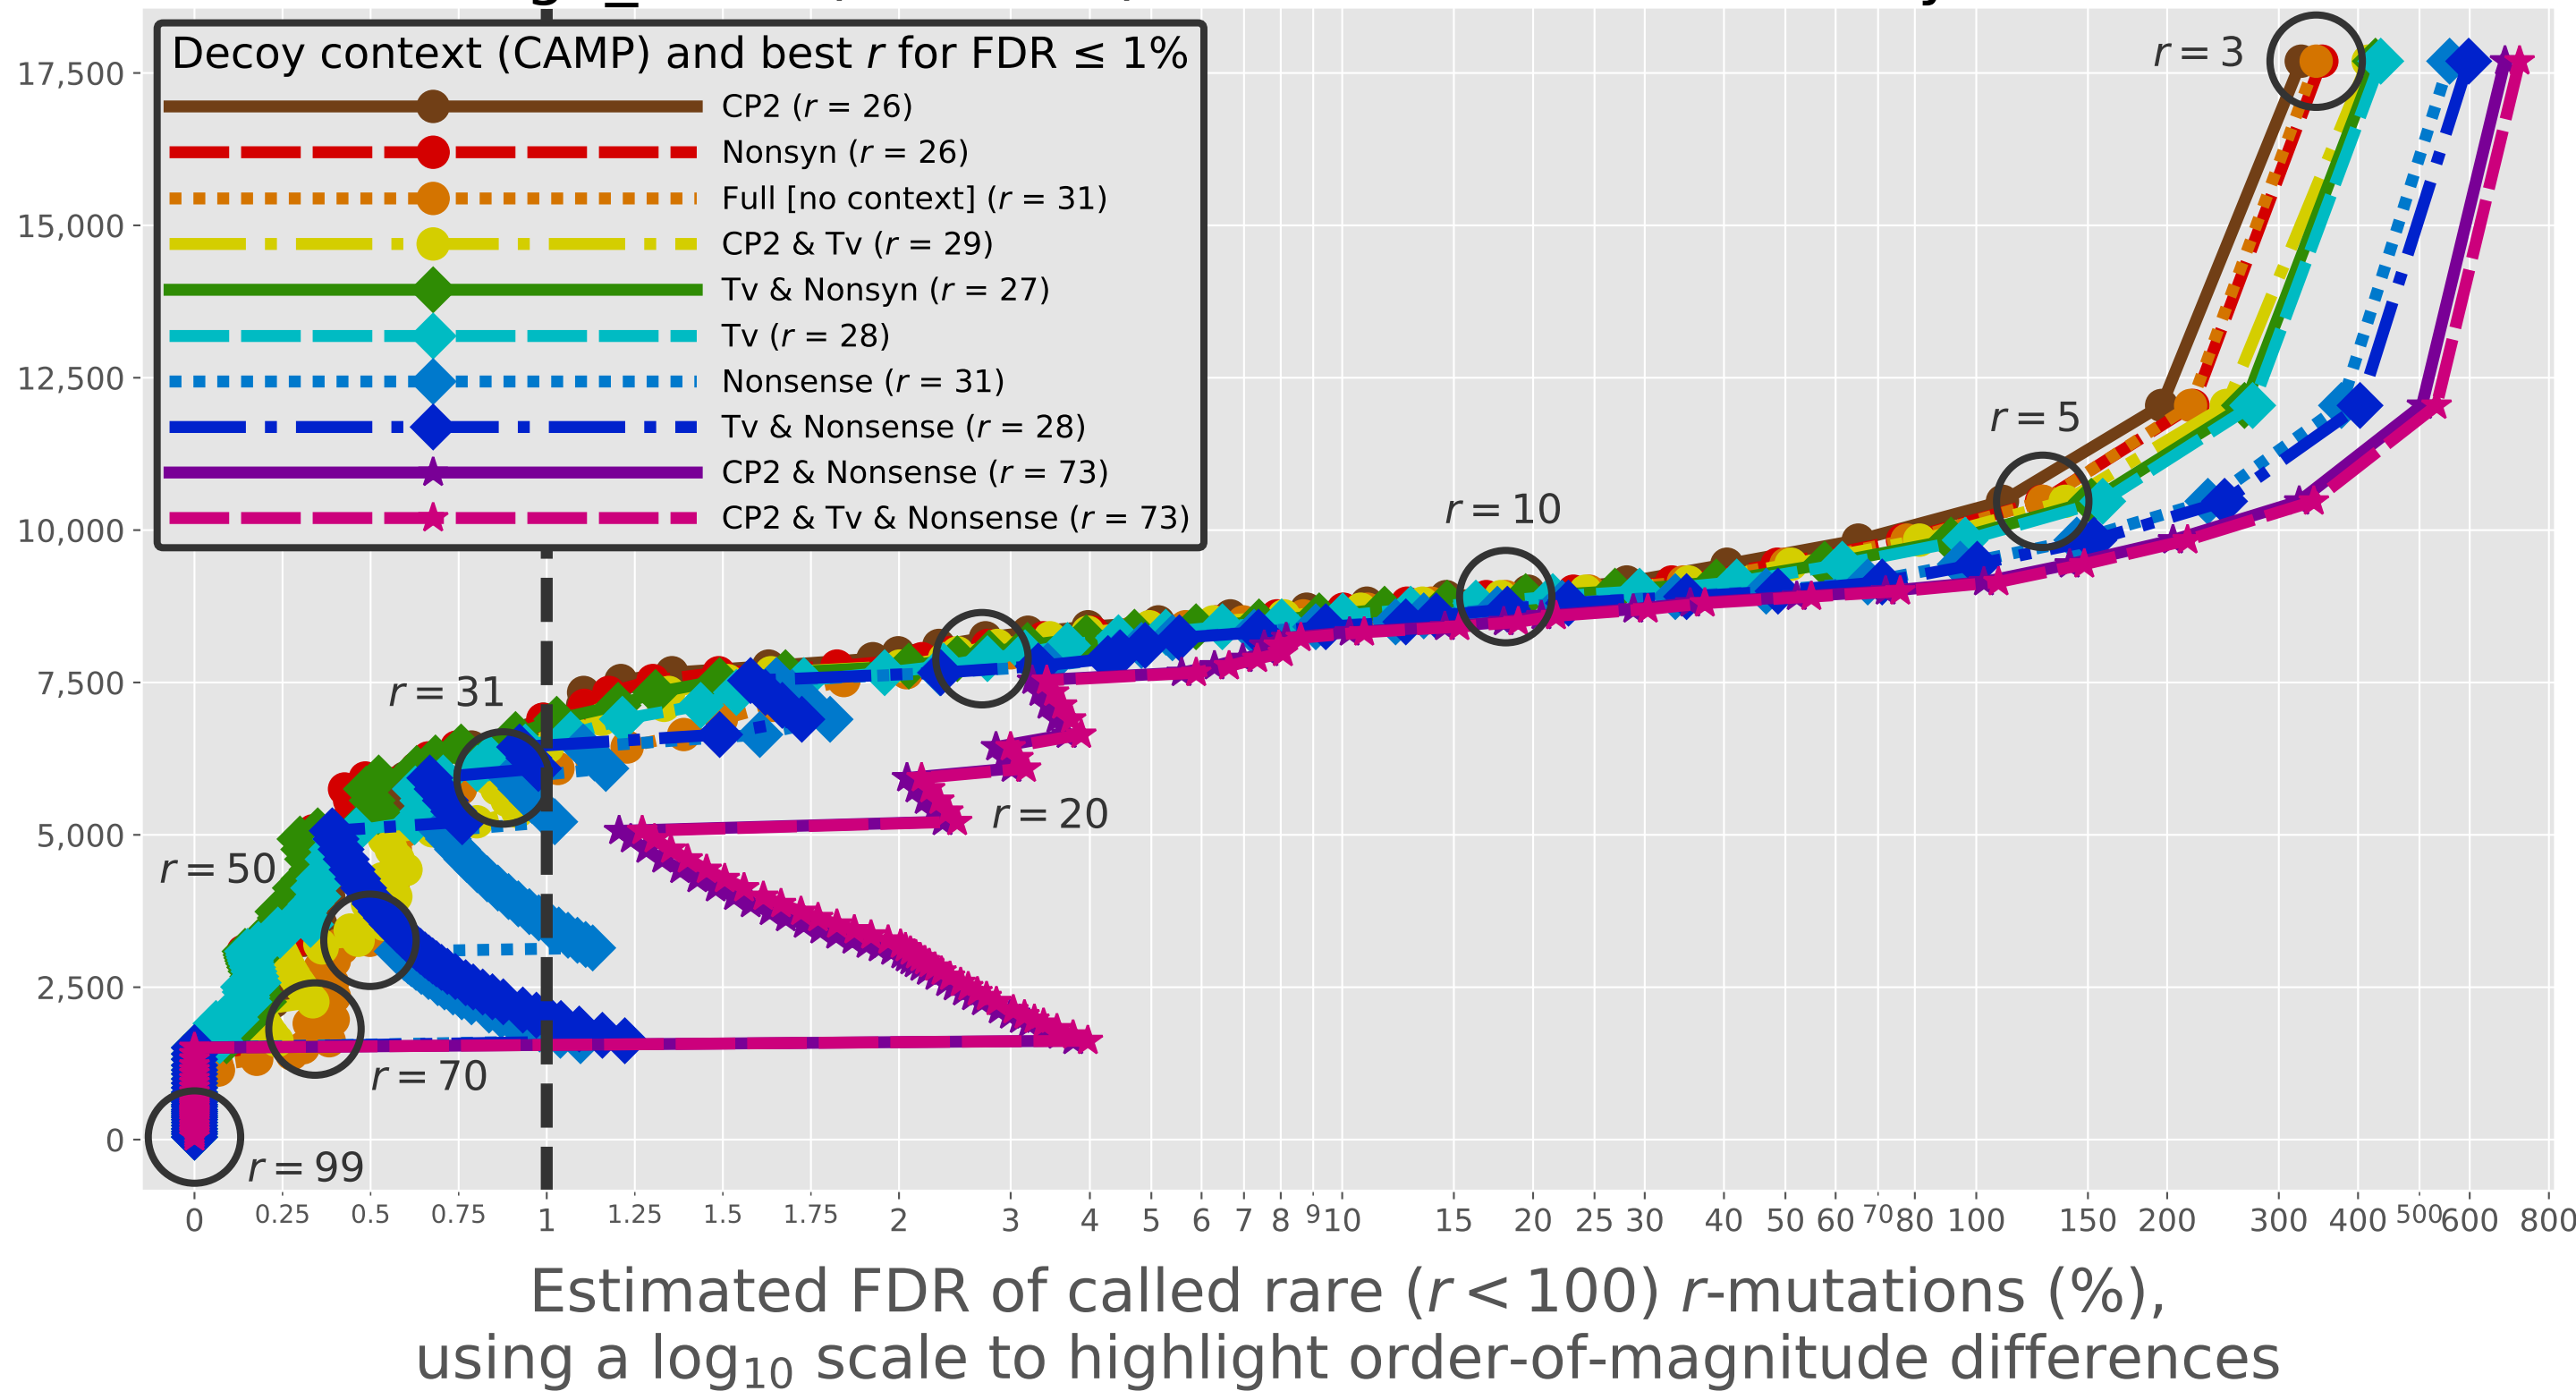

Supplement: Supplemental_Code_S2.zip [file sheepgut_fdr_curves_r.pdf › sheepgut-main/notebooks/figs/sheepgut_fdr_curves_r.pdf]
