# Supplementary material for: Analyzing rare mutations in metagenomes assembled using long and accurate reads
Source: HighWire-hosted journal article supplement (doi:10.1101/gr.276917.122), 2022-11-01
Supplement: Supplemental_Code_S2.zip [file unnormalized-cp-hists.pdf › sheepgut-main/notebooks/figs/unnormalized-cp-hists.pdf]

# Rare mutation frequencies across codon positions

Number of Mutated Positions

CAMP: LoFreq

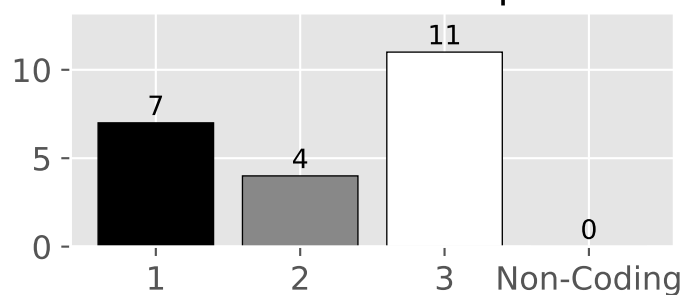

BACT1: LoFreq

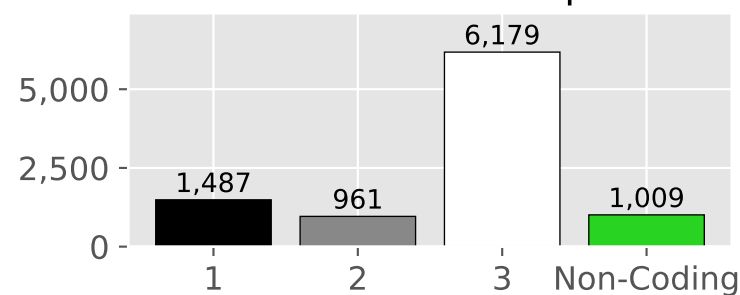

BACT2: LoFreq

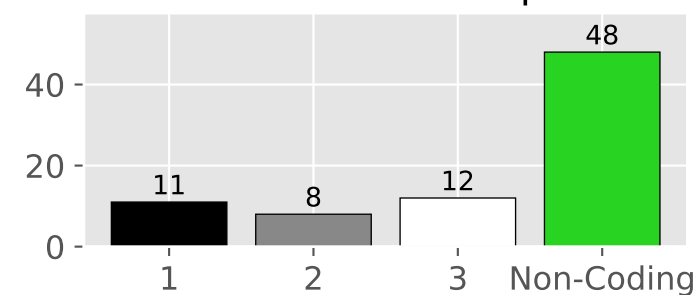

CAMP: naïve,  $p = 2\%$

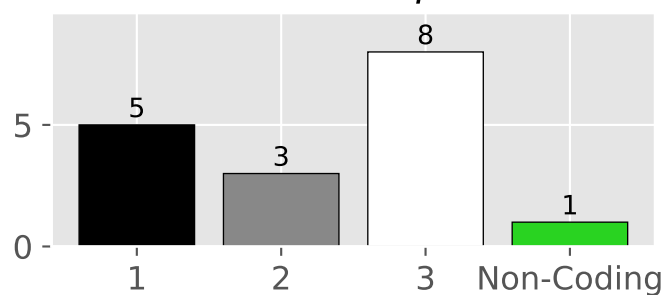

BACT1: naïve,  $p = 2\%$

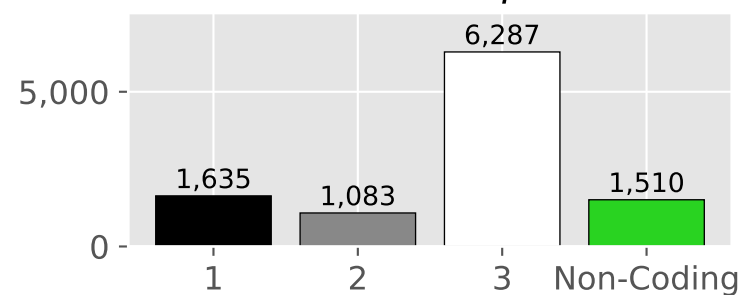

BACT2: naïve,  $p = 2\%$

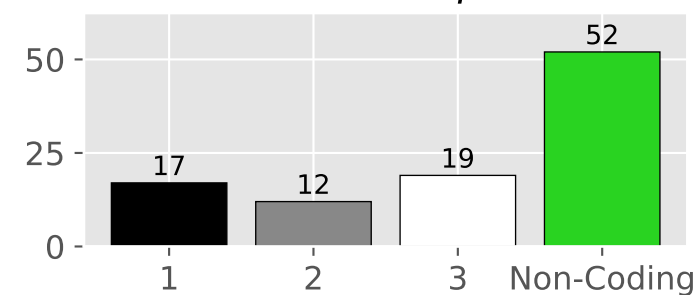

CAMP: naïve,  $p = 1\%$

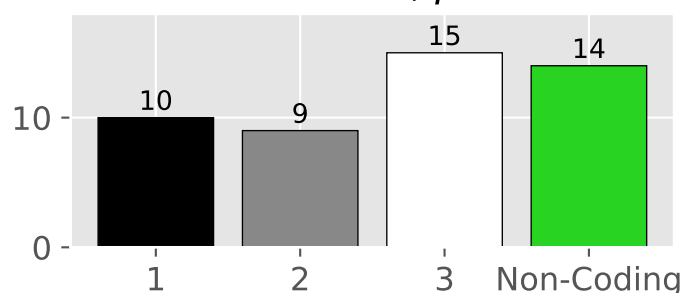

BACT1: naïve,  $p = 1\%$

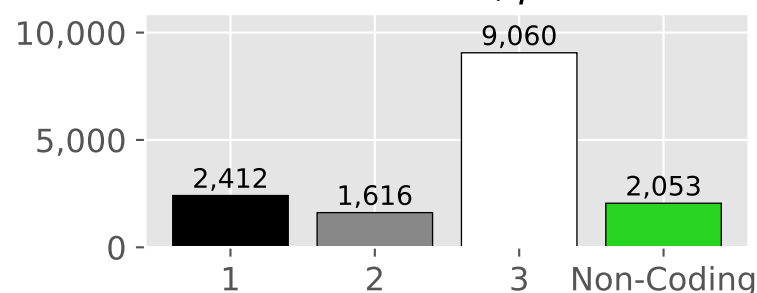

BACT2: naïve,  $p = 1\%$

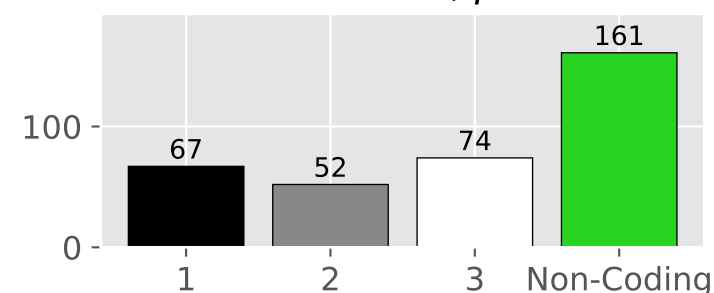

**CAMP: naïve,  $p = 0.5\%$**

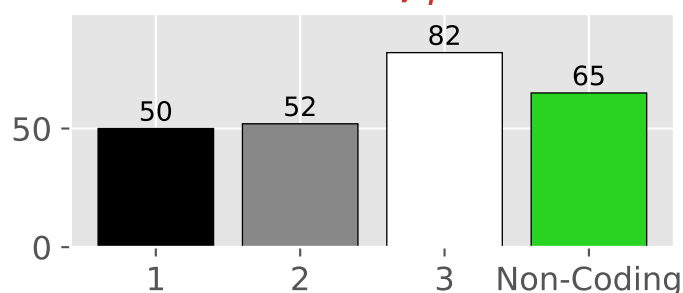

BACT1: naïve,  $p = 0.5\%$

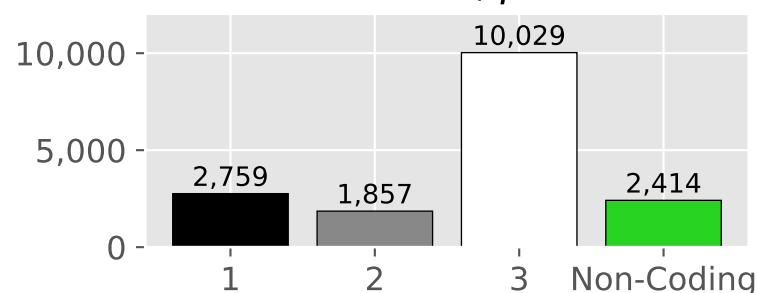

BACT2: naïve,  $p = 0.5\%$

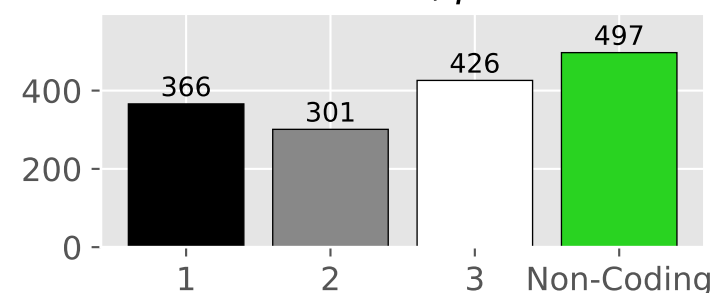

CAMP: naïve,  $p = 0.25\%$

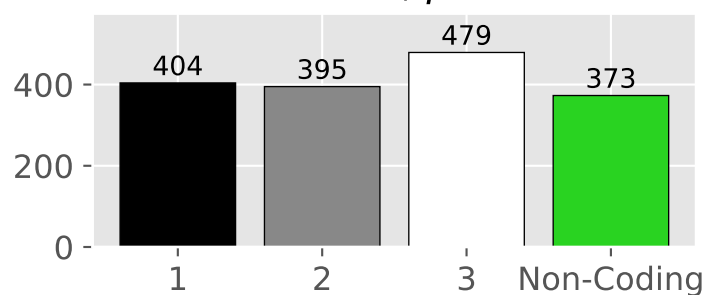

BACT1: naïve,  $p = 0.25\%$

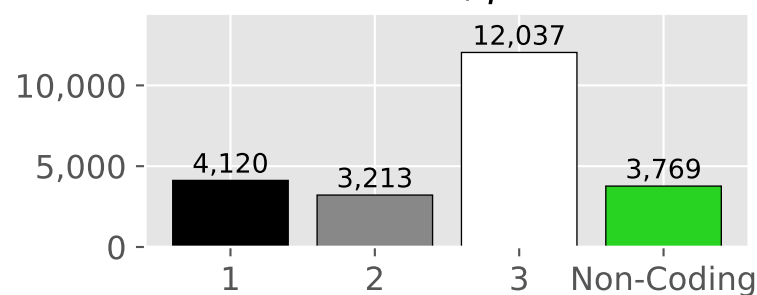

BACT2: naïve,  $p = 0.25\%$

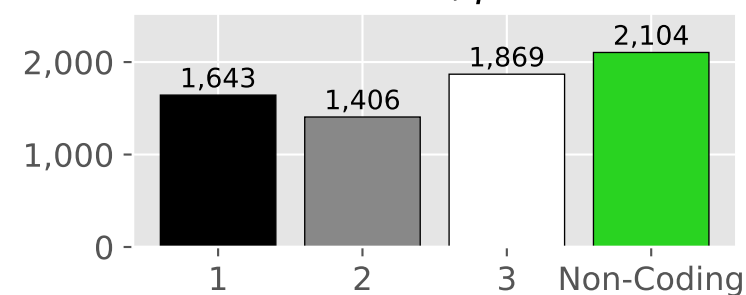

CAMP: naïve,  $p = 0.15\%$

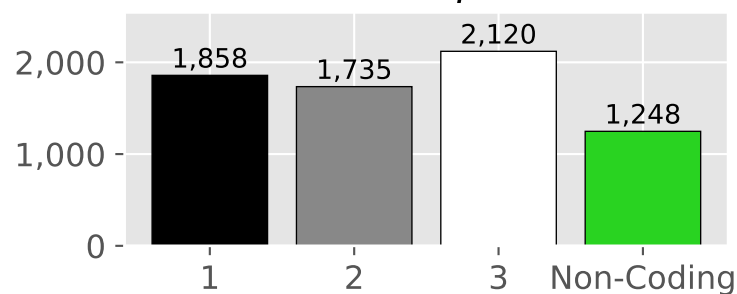

BACT1: naïve,  $p = 0.15\%$

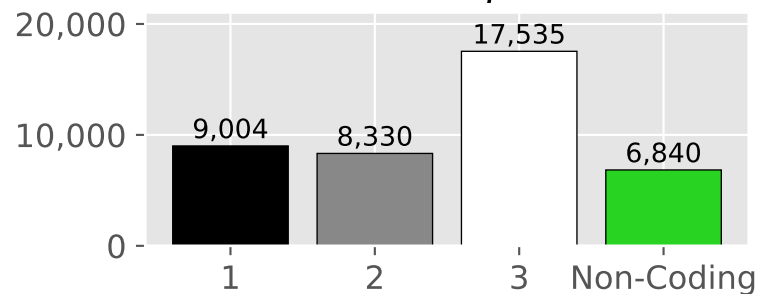

BACT2: naïve,  $p = 0.15\%$

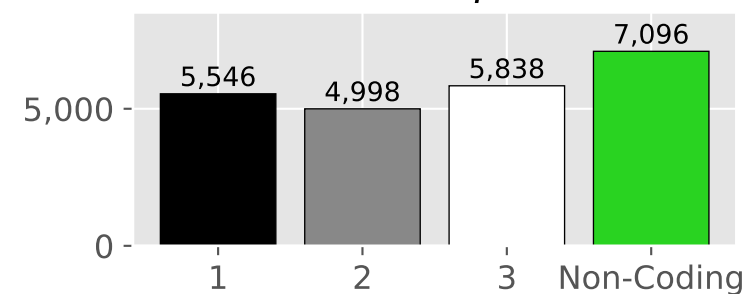

Codon Position
